# Supplementary material for: Novel eye genes systematically discovered through an integrated analysis of mouse transcriptomes and phenome
Source: PubMed Central journal article supplement — Comput Struct Biotechnol J. 2019 Dec 27;18:73–82. doi: 10.1016/j.csbj.2019.12.009 (PMC6951830; doi:10.1016/j.csbj.2019.12.009), 2019-12-27
Supplement: mmc1.pdf [file mmc1.pdf]

Supplementary Materials for

## **Novel Eye Genes Systematically Discovered through an Integrated Analysis of Mouse Transcriptomes and Phenome**

Chia-Yin Chiang, Yung-Hao Ching, Ting-Yan Chang, Liang-Shuan Hu, Yee Siang Yong, Pei Ying Keak, Ivana Mustika, Ming-Der Lin, Ben-Yang Liao

### **Content**

#### **Supplementary Figures**

**Figure S1.** The flowchart to summarize the processes to predict tissue functions of genes in the present study.

**Figure S2.** Preservation of modules according to  $Z_{\text{summary}}$  scores.

**Figure S3.** Modules in the GNF1M-based coexpression network of mouse genes.

**Figure S4.** Modules in the MOE430-based coexpression network of mouse genes.

**Figure S5.** Modules in the RNA-seq-based coexpression network of mouse genes.

**Figure S6.** Genes associated with the “eye” module, when coexpressed gene modules were defined by PGCNA.

**Figure S7.** Genes with a higher confidence score of predicted eye functions tend to have a higher  $Z_{\text{eye}}$ .

**Figure S8.** Consequences of knocking down the zebrafish ortholog of the mouse gene, *Adal*.

**Figure S9.** Consequences of knocking down the zebrafish orthologs of the mouse gene, *Ankrd33*.

**Figure S10.** Consequences of knocking down the zebrafish ortholog of the mouse gene, *Car14*.

**Figure S11.** Consequences of knocking down the zebrafish ortholog of the mouse gene, *Ccdc126*.

**Figure S12.** Consequences of knocking down the zebrafish orthologs of the mouse gene, *Dhx32*.

**Figure S13.** Consequences of knocking down the zebrafish orthologs of the mouse gene, *Dkk3*.

**Figure S14.** Consequences of knocking down the zebrafish orthologs of the mouse gene, *Fam169a*.

**Figure S15.** Consequences of knocking down the zebrafish ortholog of the mouse gene, *Frmpd2*.

**Figure S16.** Consequences of knocking down the zebrafish ortholog of the mouse gene, *Grifin*.

**Figure S17.** Consequences of knocking down the zebrafish ortholog of the mouse gene, *Kcng14*.

**Figure S18.** Consequences of knocking down the zebrafish ortholog of the mouse gene, *Irit2*.

**Figure S19.** Consequences of knocking down the zebrafish orthologs of the mouse gene, *Ppef2*.

**Figure S20.** Consequences of knocking down the zebrafish orthologs of the mouse gene, *Ppm1n*.

**Figure S21.** Consequences of knocking down the zebrafish ortholog of the mouse gene, *Tlhc1*.

**Figure S22.** Consequences of knocking down the zebrafish ortholog of the mouse gene, *Wdr17*.

**Figure S23.** Consequences of knocking down the zebrafish ortholog of the mouse gene, *Pax6d*.

## Supplementary Tables

**Table S1.** The list of tissues whose transcriptomes were profiled by the microarray platform GNF1M and were used to construct the GNF1M-based gene coexpression network.

**Table S2.** The list of tissues whose transcriptomes were profiled by the microarray platform MOE430 2.0 and were used to construct the MOE430-based gene coexpression network.

**Table S3.** The list of tissues whose transcriptomes were profiled by the RNA-seq and were used to construct the RNA-seq-based gene coexpression network.

**Table S4.** The 47 mouse tissues used to functionally annotate gene modules and their corresponding tissue names, presented as MA codes, in MGI for the records of mutant strain phenotyping.

**Table S5.** Gene modules in the GNF1M-based coexpression network and the associated tissue identified by enrichment analysis based on mutant phenotypes for each module.

- Table S6.** Gene modules in the MOE430-based coexpression network and the associated tissue identified by enrichment analysis based on mutant phenotypes for each module.
- Table S7.** Genes modules in the RNA-seq-based coexpression network and the associated tissue identified by enrichment analysis based on mutant phenotypes for each module.
- Table S8.** The module IDs that were associated with any of the 47 mouse tissues for each of the GNF1M-, MOE430- or RNA-seq-based network.
- Table S9.**  $R_{dcv/phe}$  for each set of genes with a given confidence score and a given predicted tissue function.
- Table S10.** Enrichment of human orthologs of mouse genes with the top ranked  $Z_{eye}$  in genes cataloged in RetNet (dubbed “RetNet”) or HPO-defined eye disease genes (dubbed “HPO”).
- Table S11.** Mouse genes whose predicted eye functions were supported by all the three datasets (i.e., with a high confidence score).
- Table S12.** Mouse genes whose predicted eye functions were supported by two of the three datasets (i.e., with a medium confidence score)
- Table S13.** The number of phenotypically unannotated genes for each set of genes with a given confidence score and a given predicted tissue function.
- Table S14.** Candidate genes whose vision/eye phenotype have been examined by IMPC, and the gross eye morphology that have been measured in the gene deletion strains.
- Table S15.** human and zebrafish orthologs of mouse eye candidate genes.
- Table S16.** Information of morpholino oligoes for functional validation in the zebrafish system.

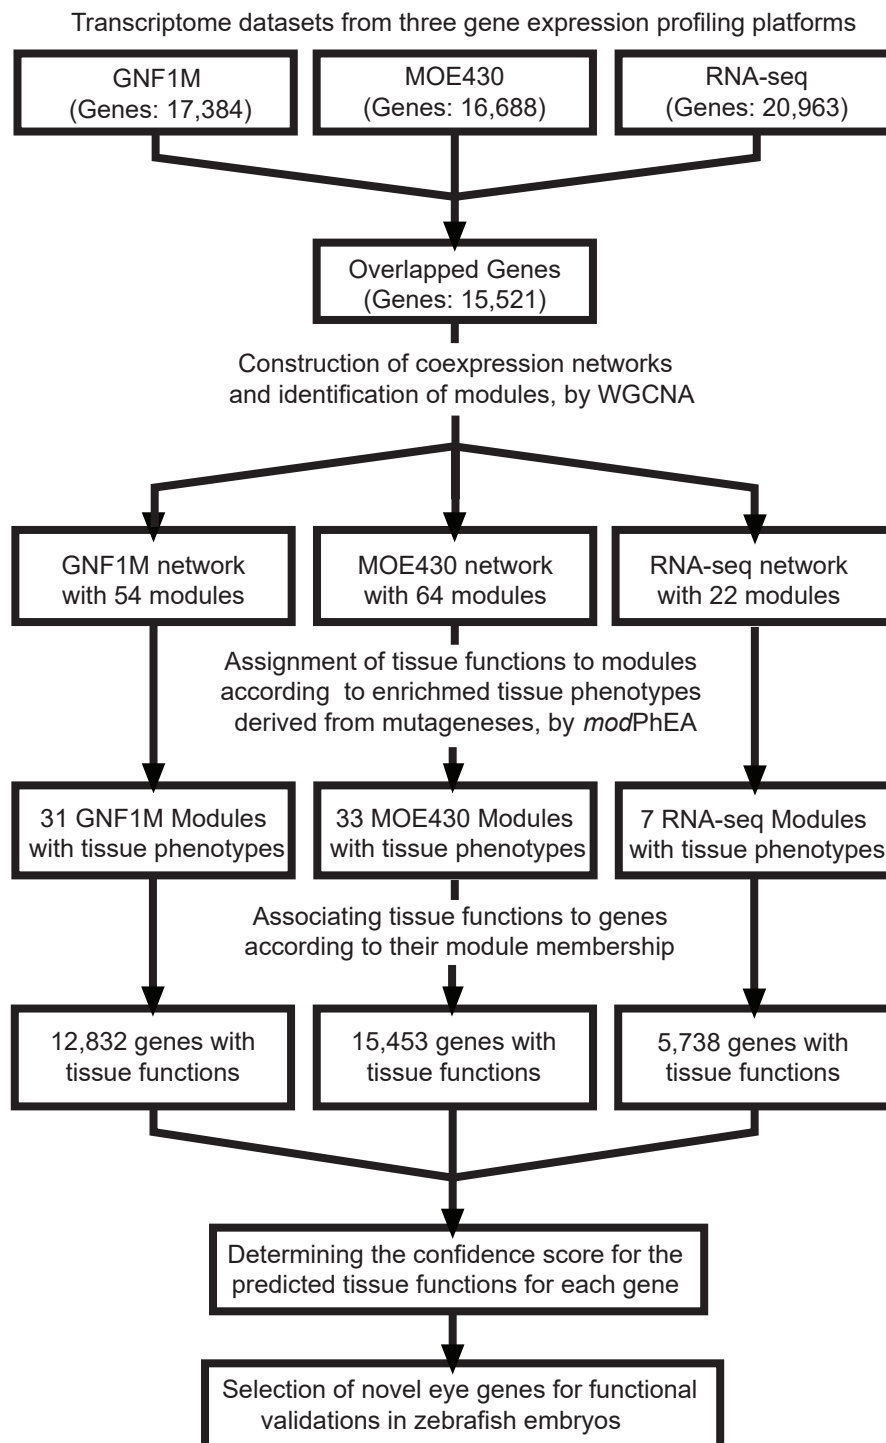

**Figure S1.** The flowchart to summarize the procedures to predict tissue functions of genes in the present study.

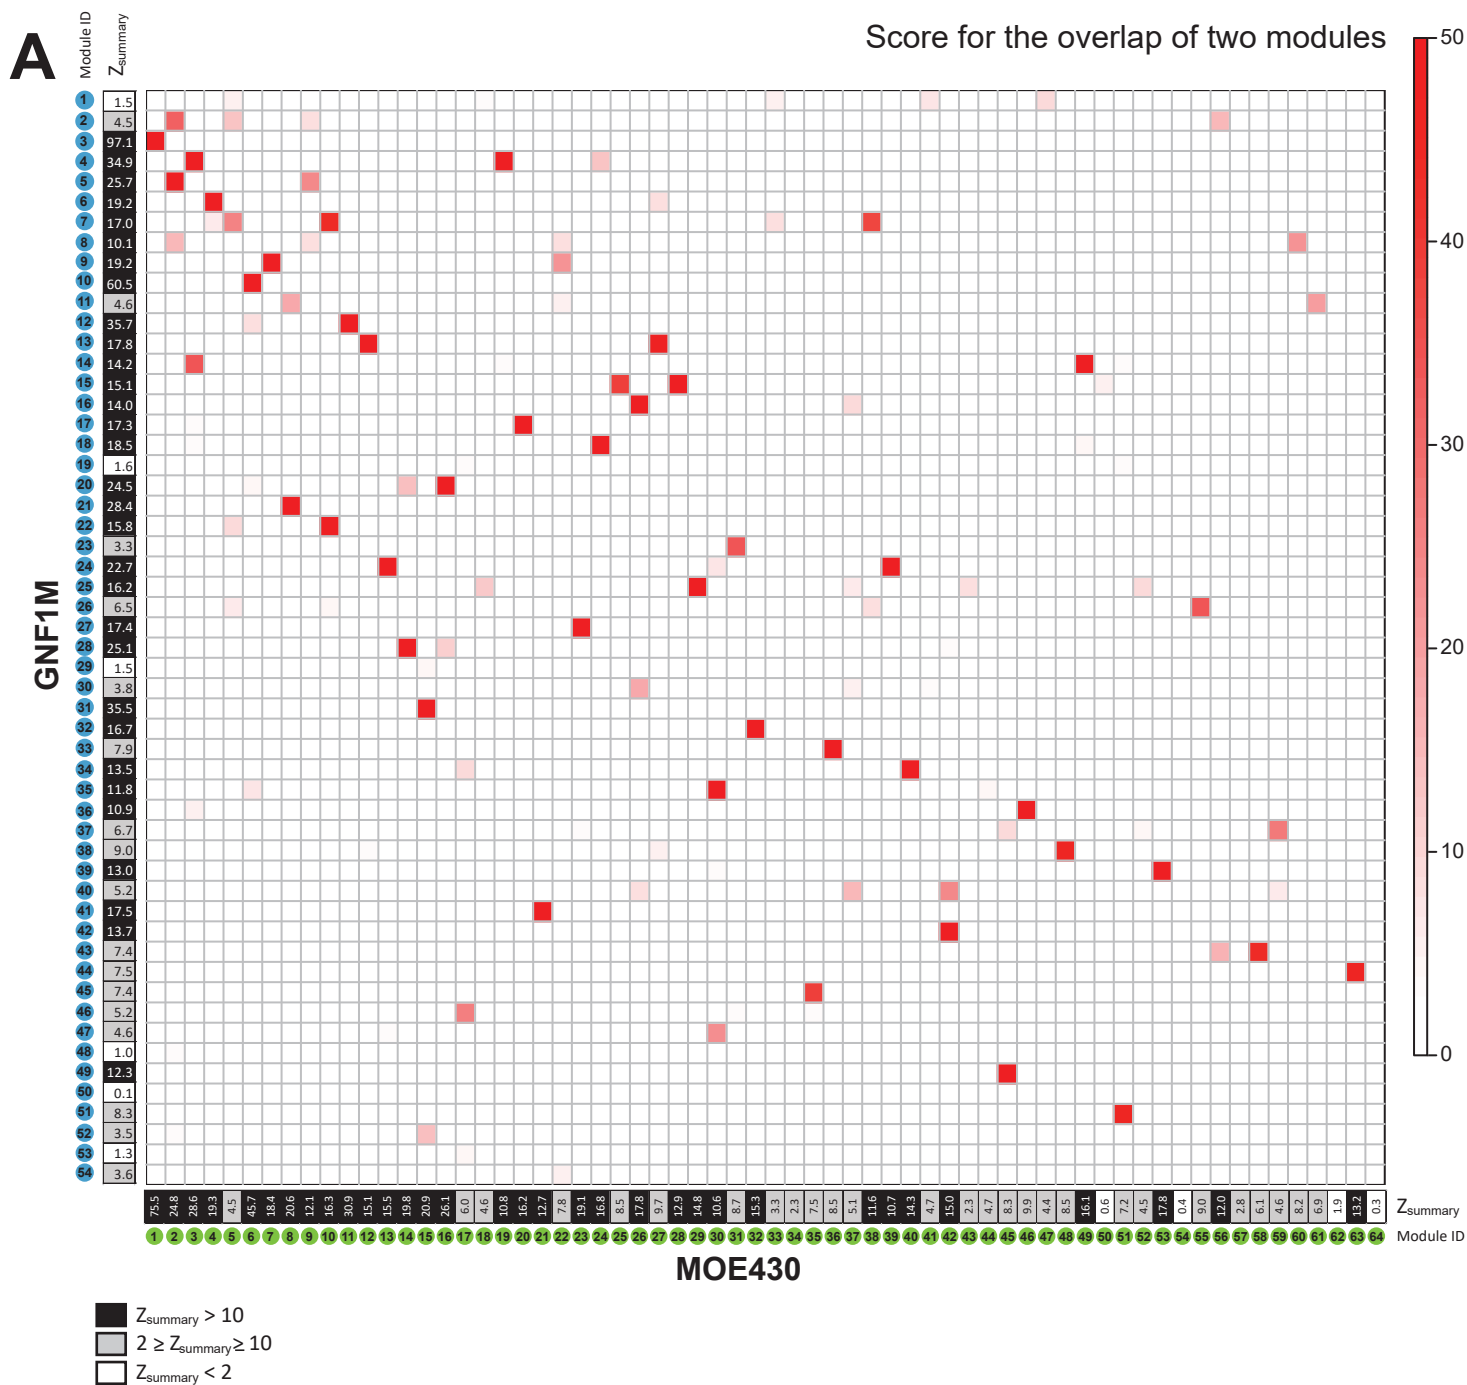

**Figure S2.** Preservation of modules according to  $Z_{summary}$  scores.  $Z_{summary}$  scores are provided for: (A) GNF1M-based vs. MOE430-based, (B) GNF1M-based vs. RNA-seq-based or (C) MOE430-based vs. RNA-seq-based coexpression genes networks. A  $Z_{summary} > 10$  indicates a high preservation;  $10 \geq Z_{summary} > 2$  indicates a moderate preservation;  $Z_{summary} < 2$  means no preservation. Each score for the overlap of two modules was the  $-\log_{10}$   $P$  value under the null hypothesis of the number of overlapped genes between the given two modules is expected by chance, according to a Fisher's Exact test. Suppl. Tables S5 – S7 provide descriptions of the module IDs listed in A, B, and C, respectively.

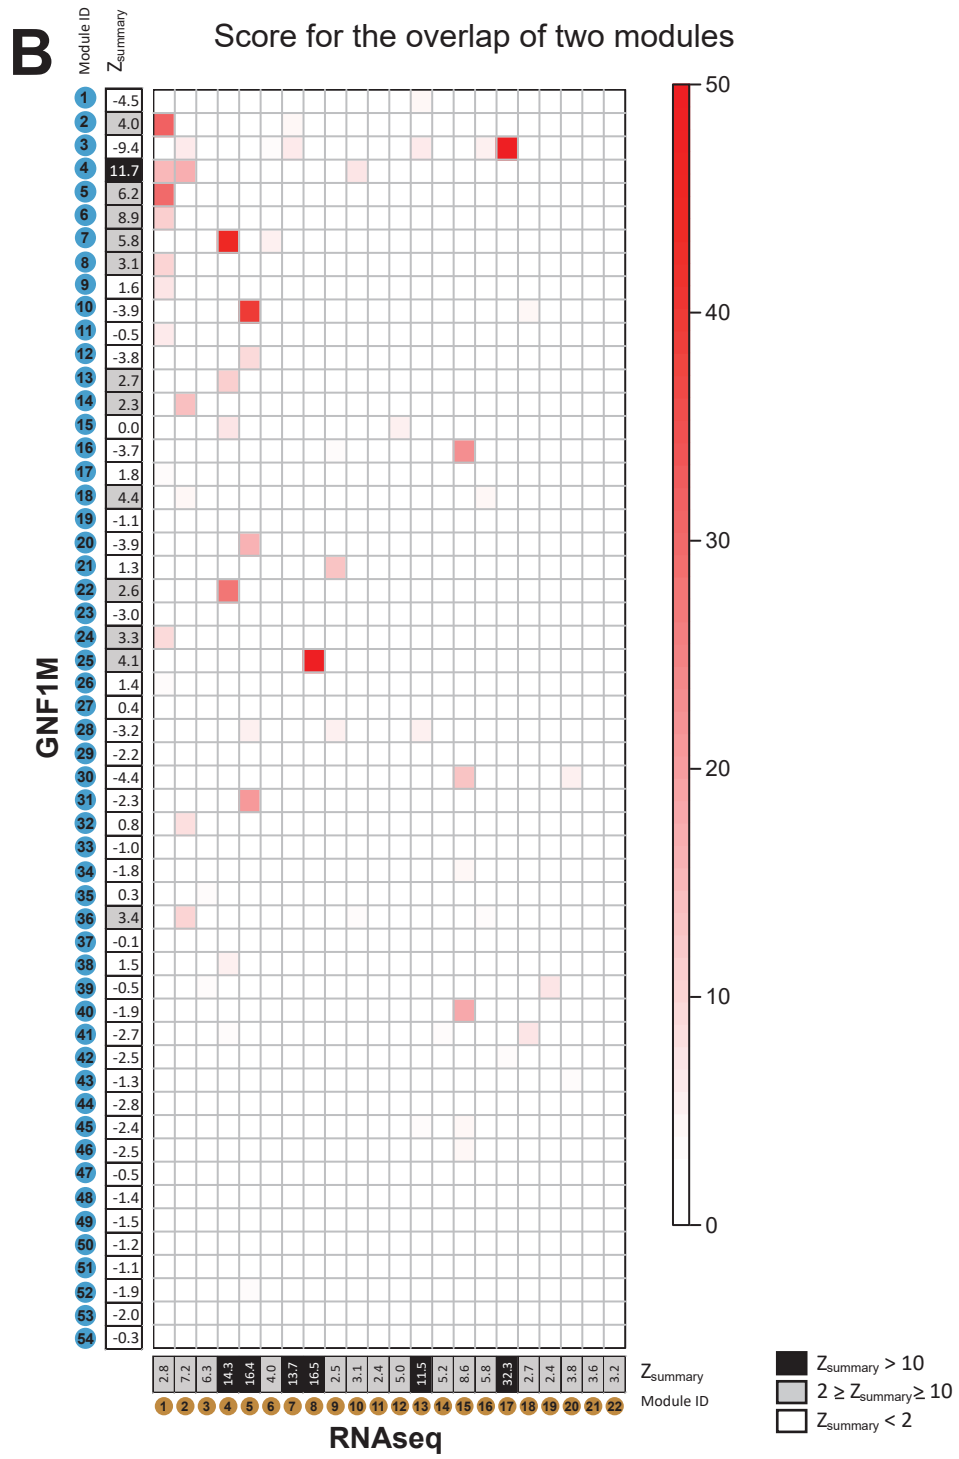

Figure S2. Continued.

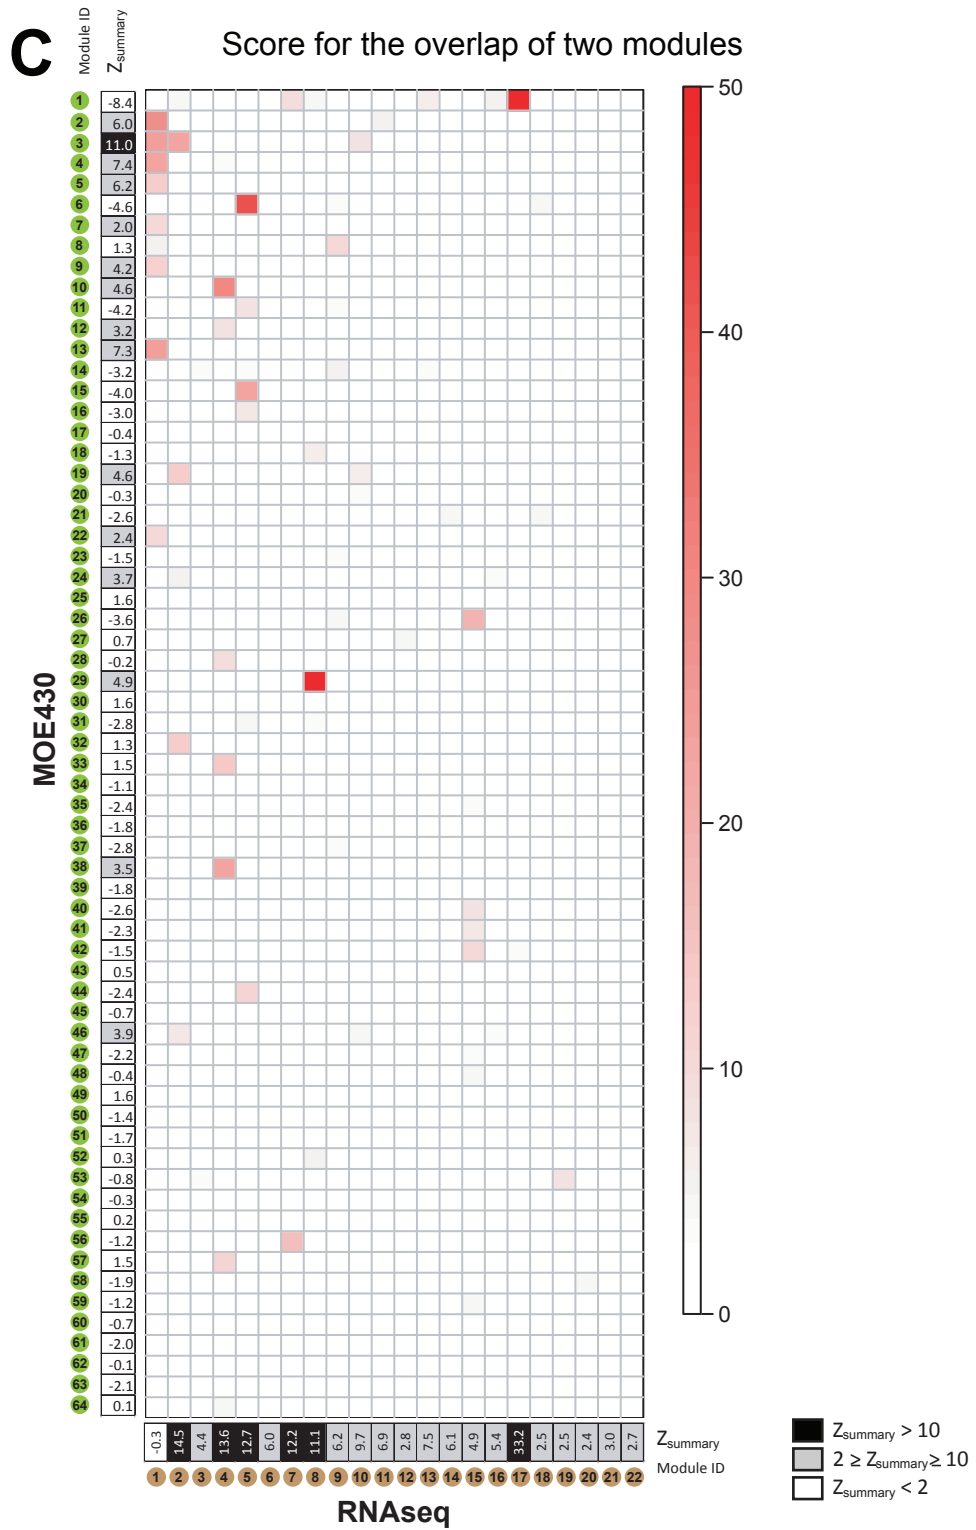

Figure S2. Continued.

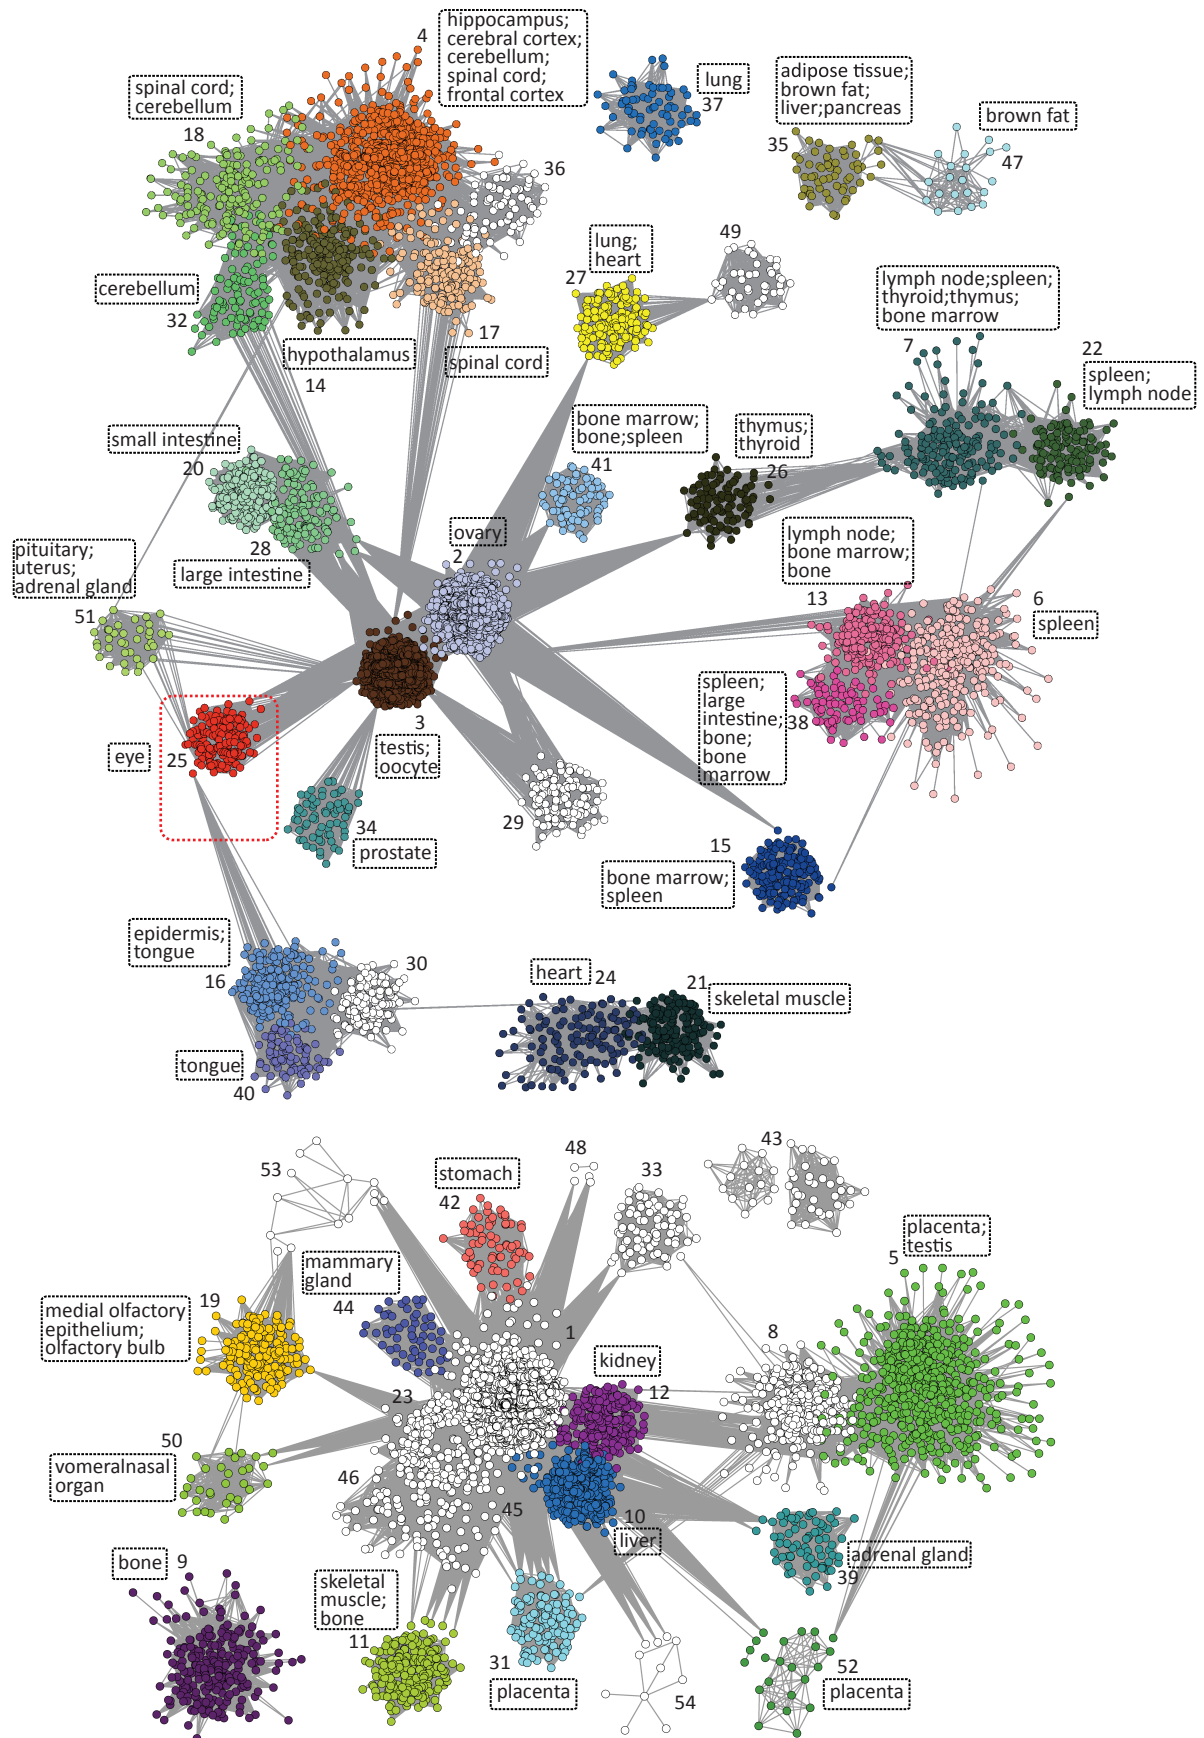

**Figure S3.** Modules in the GNF1M-based coexpression network of mouse genes. Genes are represented as nodes and each node is connected to all of the other nodes in the weighted network. Only connections with  $CoExp \geq 0.3$  are shown for visual convenience. The genes in the modules which could be functionally assigned to at least one of the 42 tissues are colored; while genes in the same module are the same color. The tissue(s) associated with each module are listed in boxes with dashed borders. Module IDs that correspond to Table S5 are indicated for each gene module. Table S5 provides additional statistical details for the 54 modules identified.



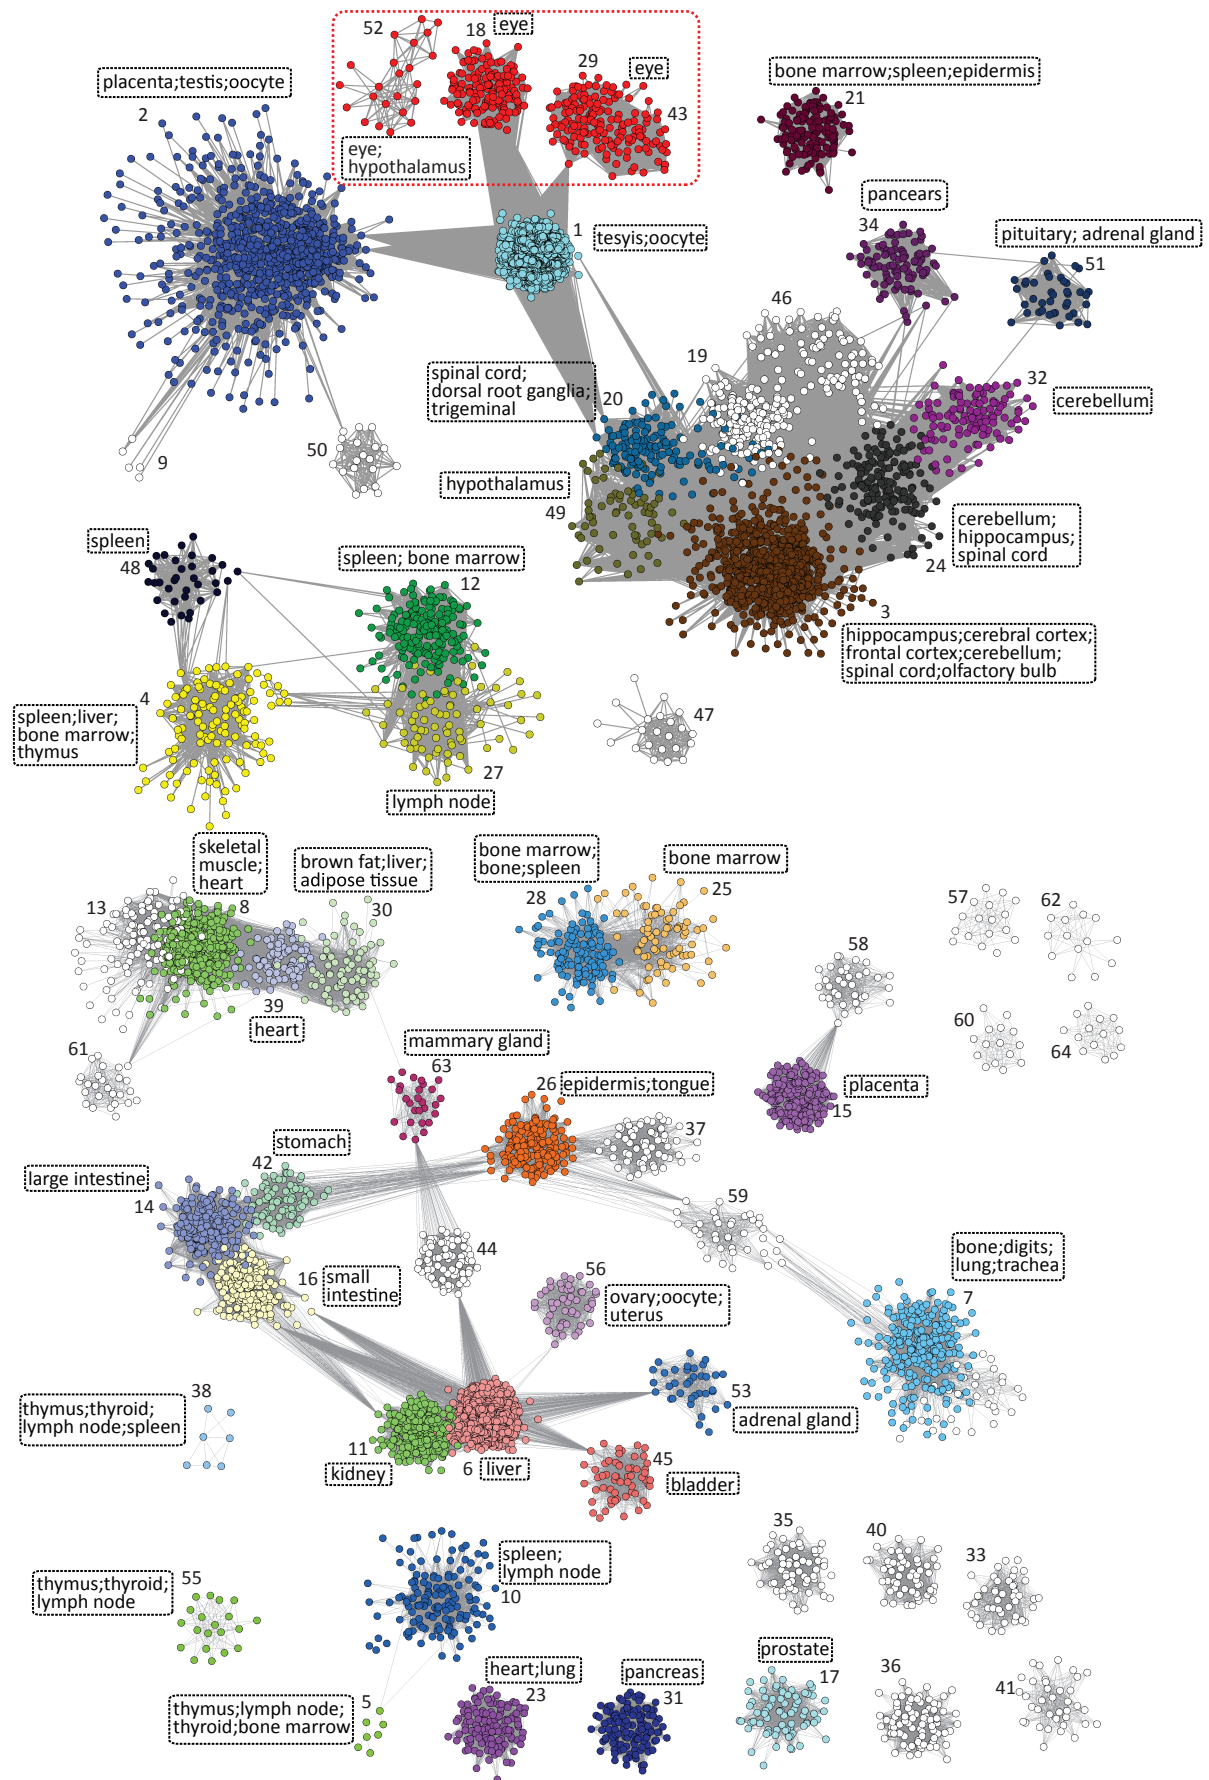

**Figure S4.** Modules in the MOE430-based coexpression network of mouse genes. Genes are represented as nodes and each node is connected to all of the other nodes in the weighted network. Only connections with  $CoExp \geq 0.3$  are shown for visual convenience. The genes in the modules which could be functionally assigned to at least one of the 42 tissues are colored; while genes in the same module are the same color. The tissue(s) associated with each module are listed in boxes with dashed borders. Module IDs that correspond to Table S6 are indicated for each gene module. Table S6 provides additional statistical details for the 64 modules identified.

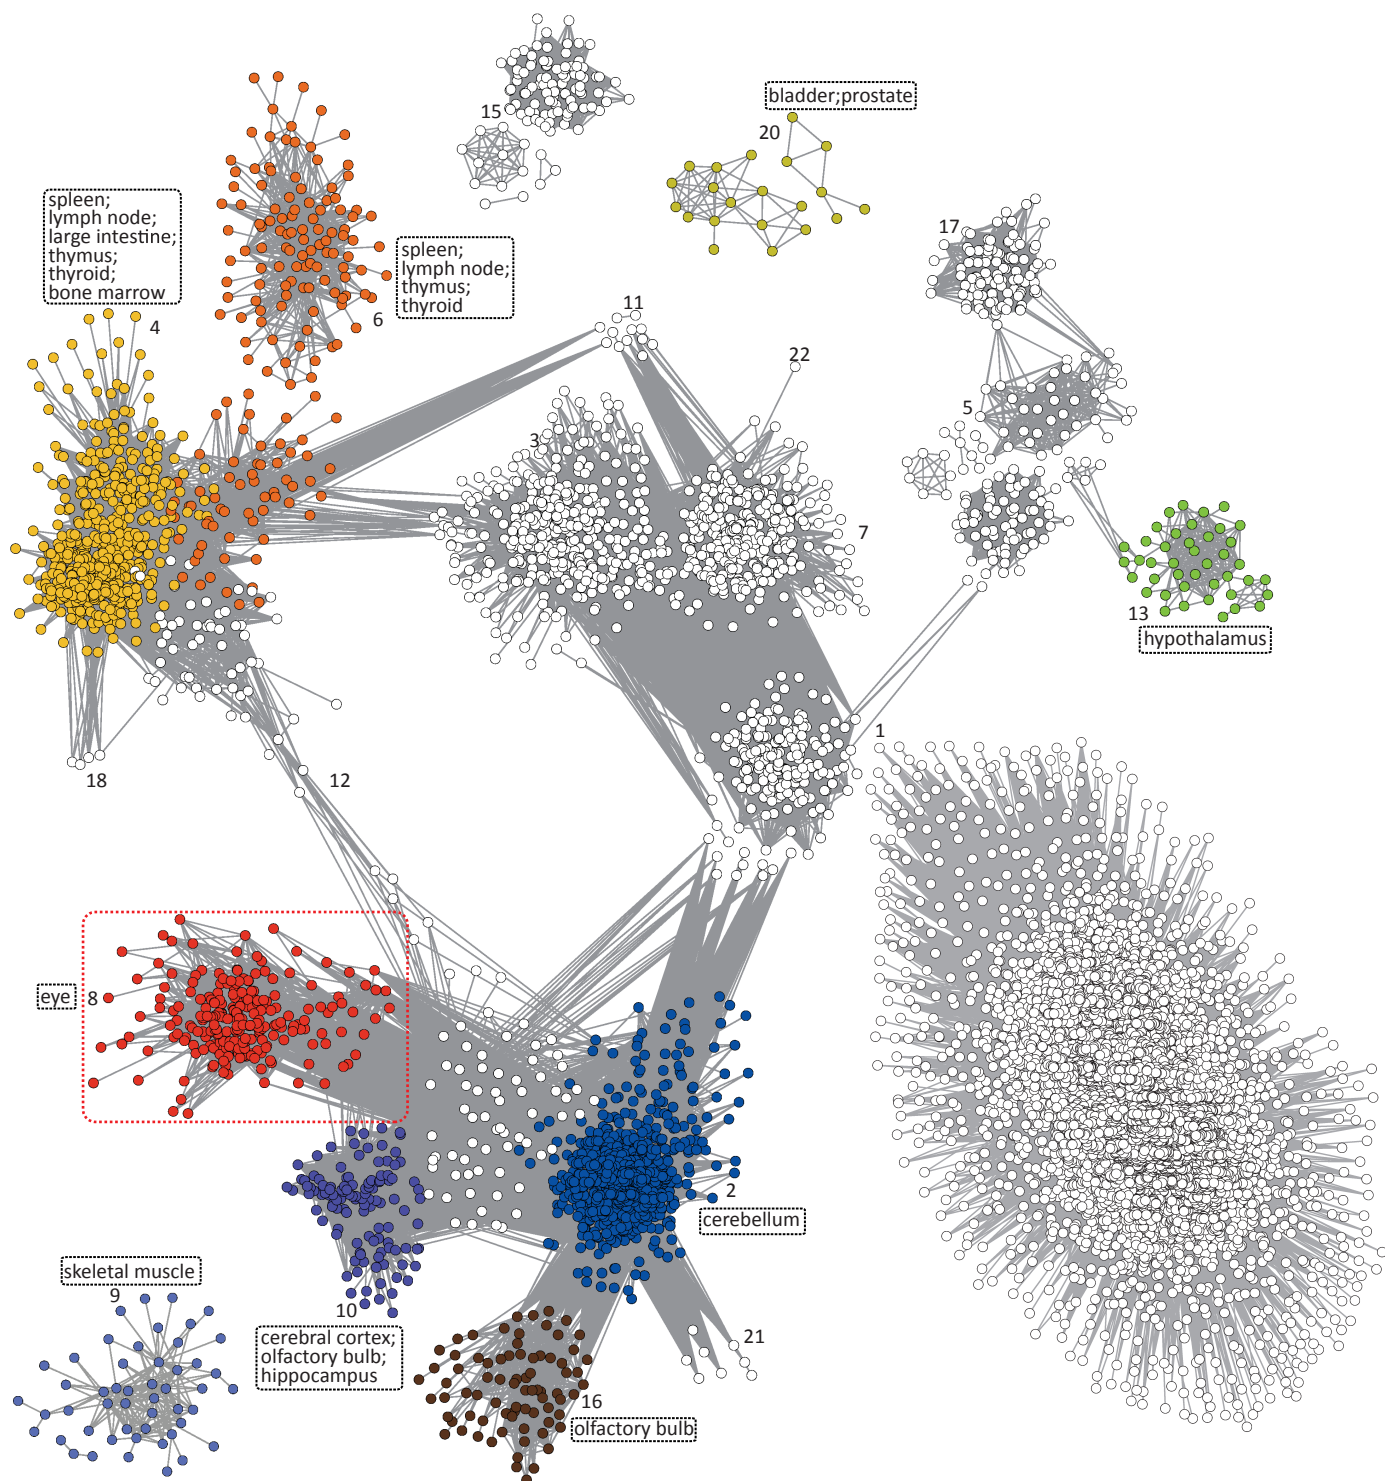

**Figure S5.** Modules in the RNA-seq-based coexpression network of mouse genes. Genes are represented as nodes and each node is connected to all of the other nodes in the weighted network. Only connections with  $CoExp \geq 0.3$  are shown for visual convenience. The genes in the modules which could be functionally assigned to at least one of the 42 tissues are colored; while genes in the same module are the same color. The tissue(s) associated with each module are listed in boxes with dashed borders. Module IDs that correspond to Table S7 are indicated for each gene module. Table S7 provides additional statistical details for the 22 modules identified.

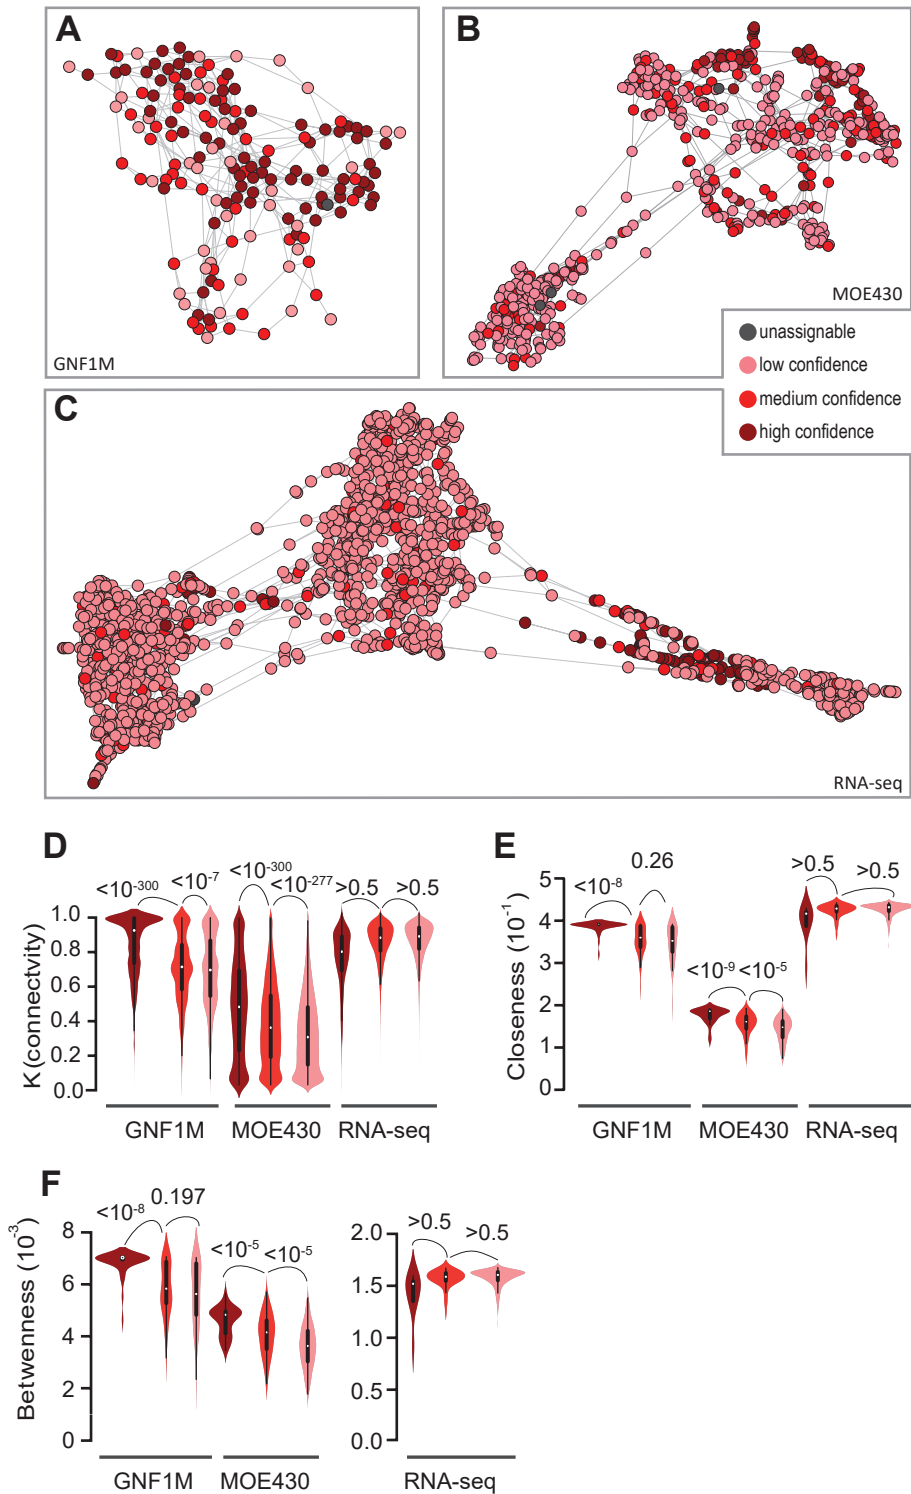

**Figure S6** Genes associated with the “eye” module, when coexpressed gene modules were defined by PGCNA. **(A)** Genes with different levels of consistency in being located in the eye module across the three platforms are shown according to their confidence scores [e.g., high (dark red), medium (red), and low (pink)] for predicted retinal function. Only intramodular connections are shown. Genes with higher confidence scores tend to have greater values of **(B)** connectivity, **(C)** betweenness, and **(D)** closeness, thereby indicating that they are more likely to be the central node of the module(s). The corresponding weighted coexpression networks used to generate the data are indicated under each panel. *P*-values were determined with the Mann-Whitney *U*-test and are associated with the arched lines that indicate the values that were compared.

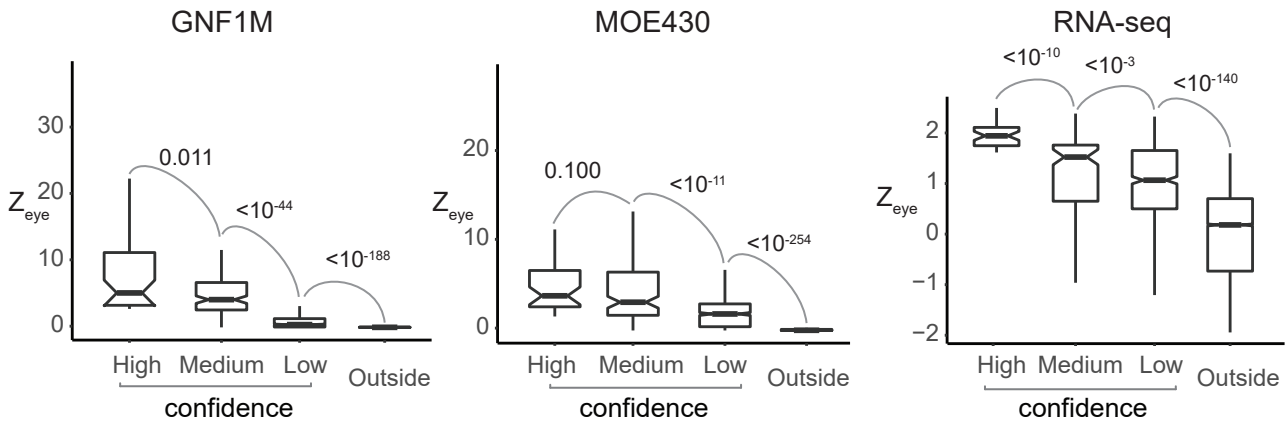

**Figure S7.** Genes with a higher confidence score of predicted eye functions tend to have a higher  $Z_{eye}$ . The boxplots for  $Z_{eye}$  values of genes with a “high”, “median” and “low” confidence score and genes outside the eye modules (marked as “outside”) are shown and the adjacent boxes were compared. *P*-values under the null hypothesis of equal median were determined with the Mann-Whitney *U*-test. These values are associated with the arched gray lines connecting the two boxes to indicate the values that were compared.

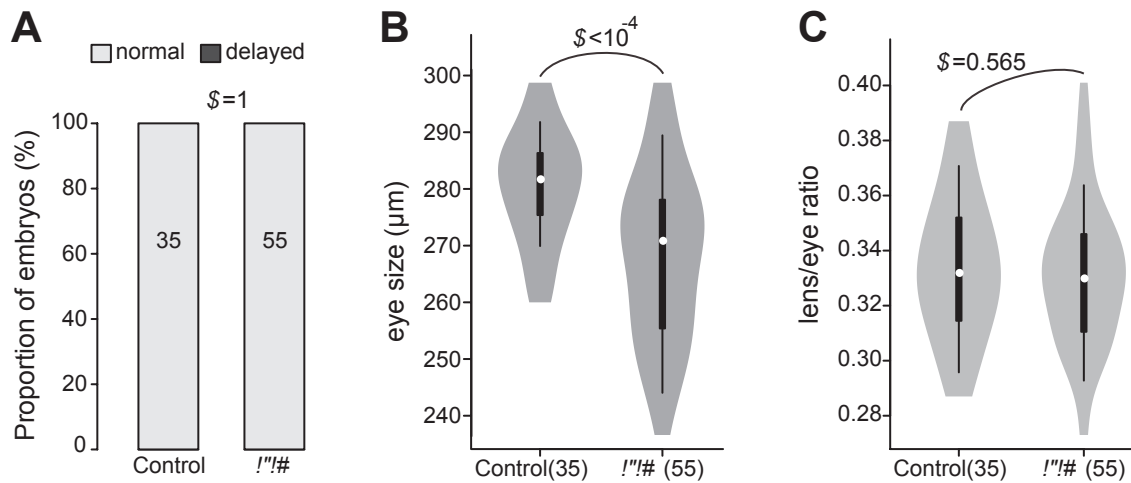

**Figure S8.** Consequences of knocking down the zebrafish ortholog of the mouse gene, *Adal*, by the group of MO labeled, “*adal*”. The phenotypes measured included: **(A)** the proportion of normal or delayed embryos, **(B)** eye size, and **(C)** lens/eye ratio. *P*-values were determined with **(A)** Fisher’s exact test or **(B, C)** the Mann-Whitney *U*-test. These values are associated with the arched gray lines at the top of each panel which indicate the values that were compared. The numbers of samples used to generate the plots are indicated in parentheses.

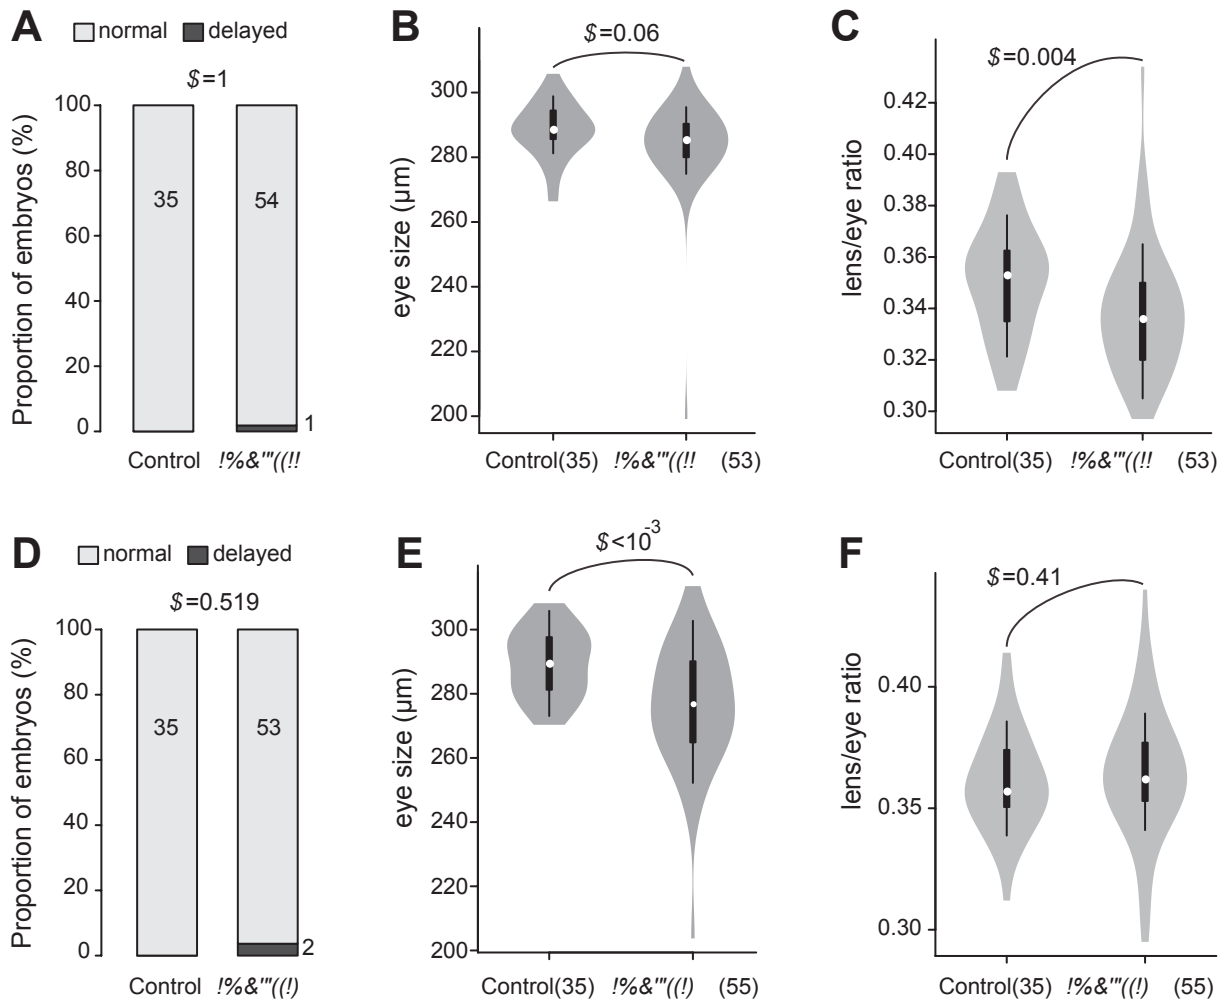

**Figure S9.** Consequences of knocking down the zebrafish orthologs of the mouse gene, *Ankrd33*, by the groups of MO labeled “*ankrd33aa*” (A-C) and “*ankrd33ab*” (D-F). The phenotypes measured included: (A, D) the proportion of normal or delayed embryos, (B, E) eye size, and (C, F) lens/eye ratio. *P*-values were determined with (A, D) Fisher’s exact test or (B, C, E, F) the Mann-Whitney *U*-test. These values are associated with the arched gray lines at the top of each panel which indicate the values that were compared. The numbers of samples used to generate the plots are indicated in parentheses.

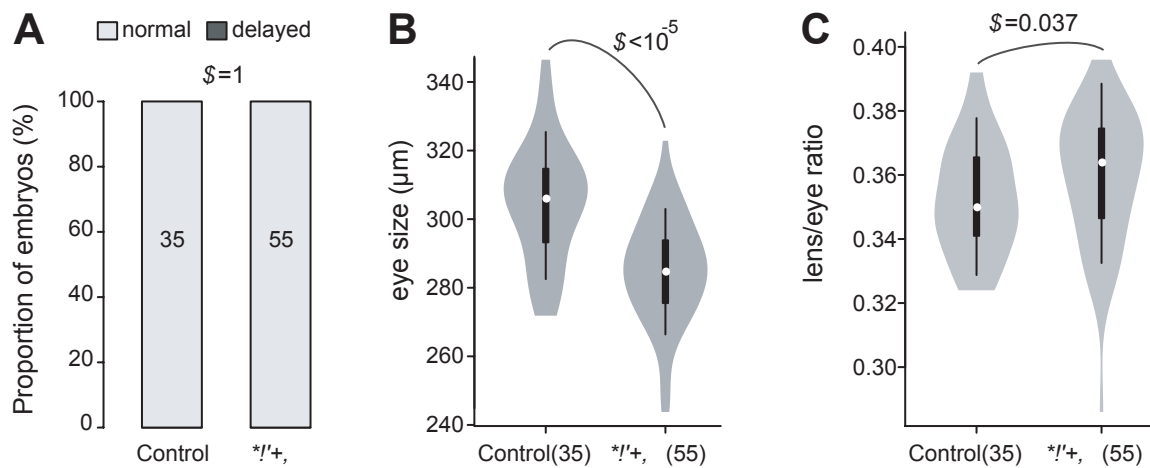

**Figure S10.** Consequences of knocking down the zebrafish ortholog of the mouse gene, *Car14*, by the group of MO labeled, “*car14*”. The phenotypes measured included: **(A)** the proportion of normal or delayed embryos, **(B)** eye size, and **(C)** lens/eye ratio. *P*-values were determined with **(A)** Fisher’s exact test or **(B, C)** the Mann-Whitney *U*-test. These values are associated with the arched gray lines at the top of each panel which indicate the values that were compared. The numbers of samples used to generate the plots are indicated in parentheses.

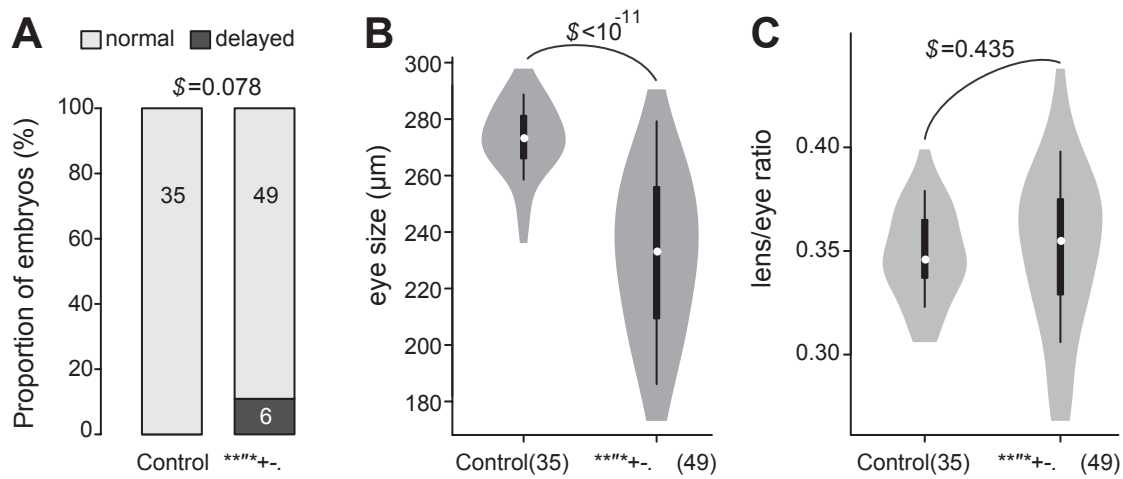

**Figure S11.** Consequences of knocking down the zebrafish ortholog of the mouse gene, *Ccdc126*, by the group of MO labeled, “*ccdc126*”. The phenotypes measured included: **(A)** the proportion of normal or delayed embryos, **(B)** eye size, and **(C)** lens/eye ratio. *P*-values were determined with **(A)** Fisher’s exact test or **(B, C)** the Mann-Whitney *U*-test. These values are associated with the arched gray lines at the top of each panel which indicate the values that were compared. The numbers of samples used to generate the plots are indicated in parentheses.



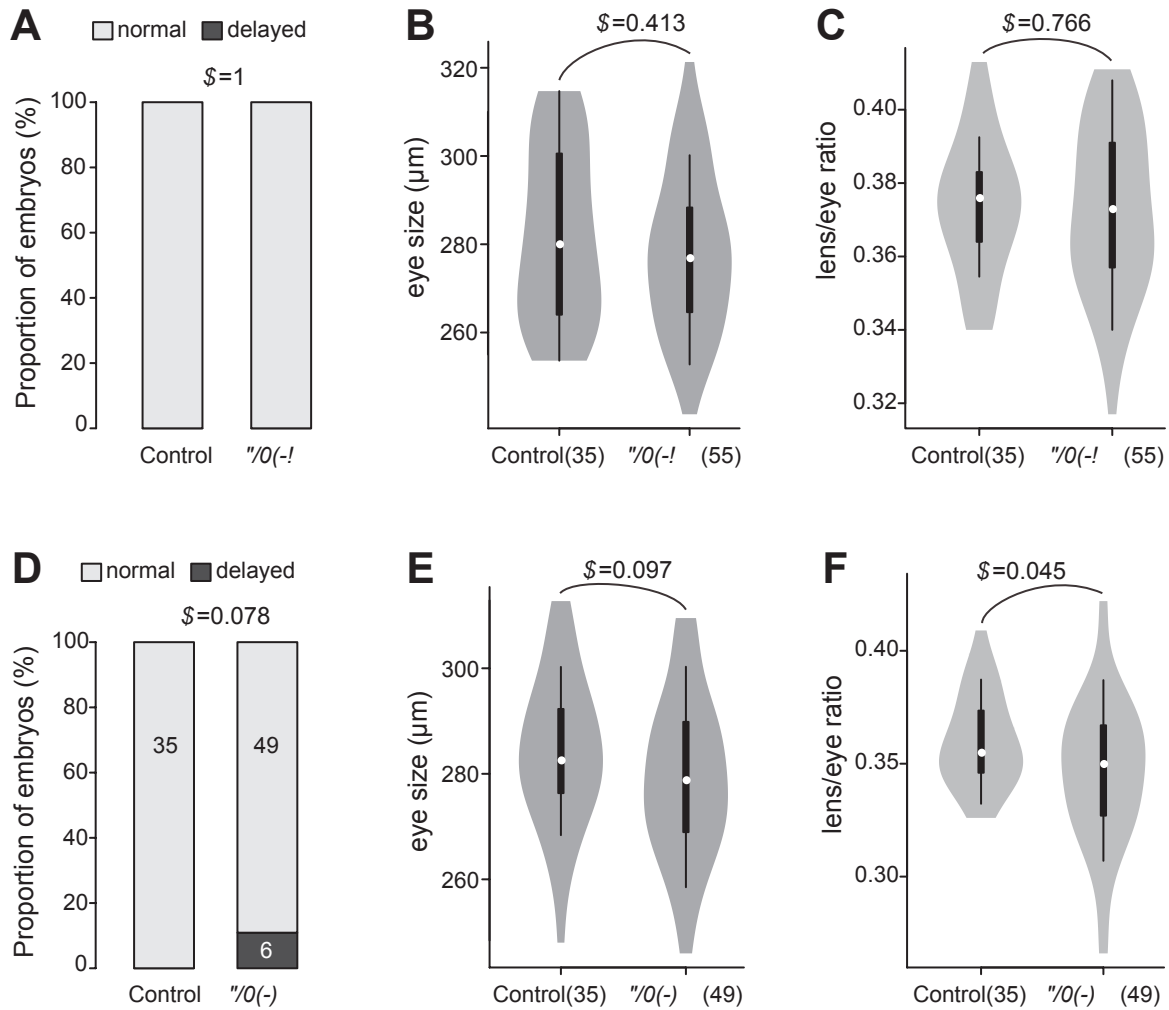

**Figure S12.** Consequences of knocking down the zebrafish orthologs of the mouse gene, *Dhx32*, by the groups of MO labeled “*dhx32a*” (A-C) and “*dhx32b*” (D-F). The phenotypes measured included: (A,D) the proportion of normal or delayed embryos, (B,E) eye size, and (C,F) lens/eye ratio. *P*-values were determined with (A,D) Fisher’s exact test or (B,C,E,F) the Mann-Whitney *U*-test. These values are associated with the arched gray lines at the top of each panel which indicate the values that were compared. The numbers of samples used to generate the plots are indicated in parentheses.

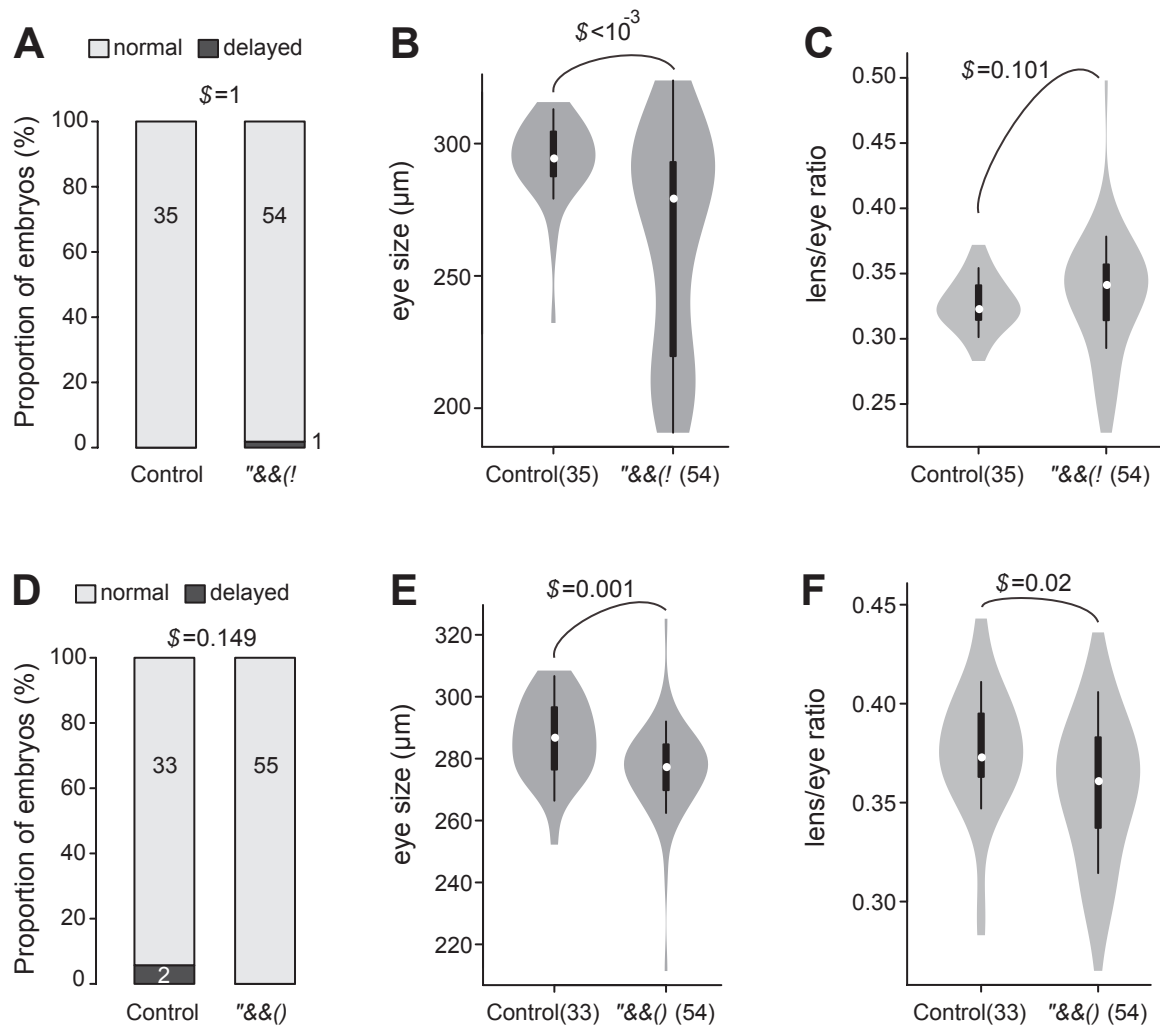

**Figure S13.** Consequences of knocking down the zebrafish orthologs of the mouse gene, *Dkk3*, by the groups of MO labeled “*dkk3a*” (A-C) and “*dkk3b*” (D-F). The phenotypes measured included: (A,D) the proportion of normal or delayed embryos, (B, E) eye size, and (C, F) lens/eye ratio. *P*-values were determined with (A,D) Fisher’s exact test or (B, C, E, F) the Mann-Whitney *U*-test. These values are associated with the arched gray lines at the top of each panel which indicate the values that were compared. The numbers of samples used to generate the plots are indicated in parentheses.

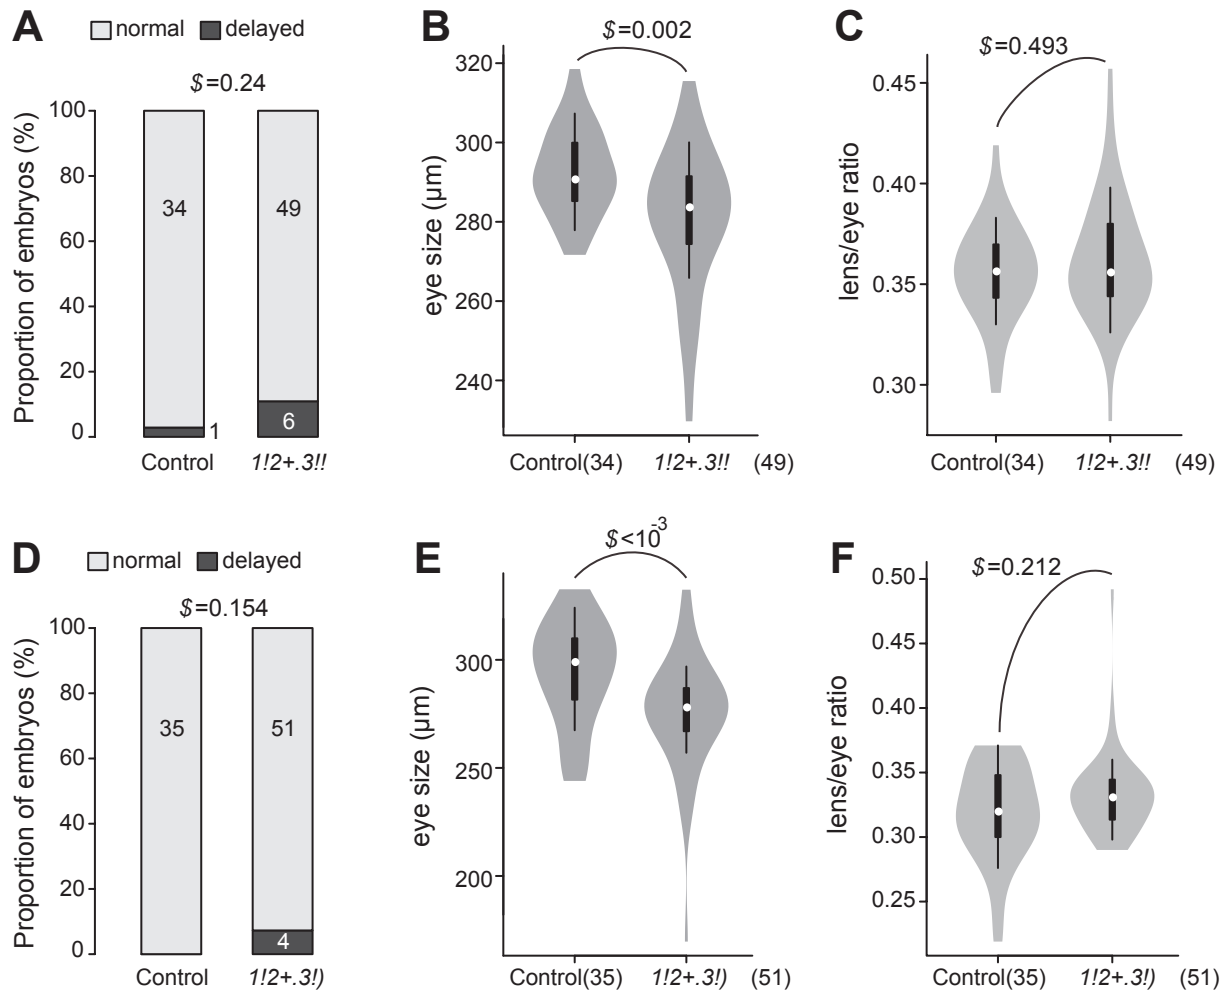

**Figure S14.** Consequences of knocking down the zebrafish orthologs of the mouse gene, *Fam169a*, by the groups of MO labeled “*fam169aa*” (A-C) and “*fam169ab*” (D-F). The phenotypes measured included: (A, D) the proportion of normal or delayed embryos, (B, E) eye size, and (C, F) lens/eye ratio. P-values were determined with (A, D) Fisher’s exact test or (B, C, E, F) the Mann-Whitney U-test. These values are associated with the arched gray lines at the top of each panel which indicate the values that were compared. The numbers of samples used to generate the plots are indicated in parentheses.

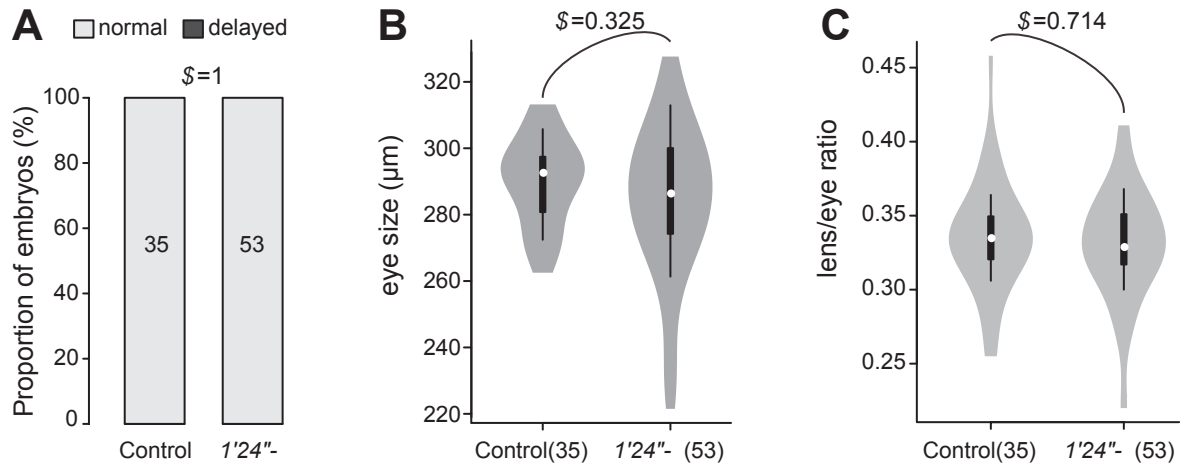

**Figure S15.** Consequences of knocking down the zebrafish ortholog of the mouse gene, *Frmpd2*, by the group of MO labeled, "*frmpd2*". The phenotypes measured included: **(A)** the proportion of normal or delayed embryos, **(B)** eye size, and **(C)** lens/eye ratio. *P*-values were determined with **(A)** Fisher's exact test or **(B, C)** the Mann-Whitney *U*-test. These values are associated with the arched gray lines at the top of each panel which indicate the values that were compared. The numbers of samples used to generate the plots are indicated in parentheses.

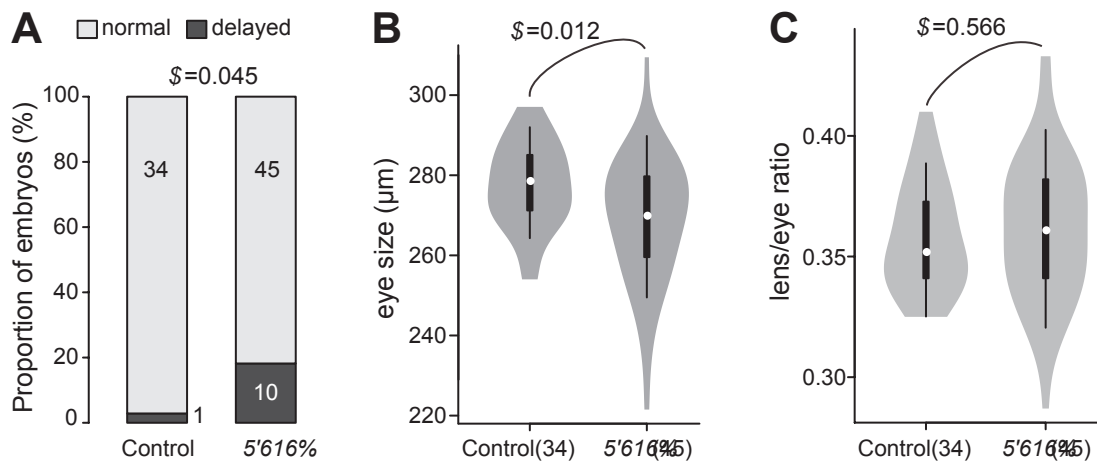

**Figure S16.** Consequences of knocking down the zebrafish ortholog of the mouse gene, *Grifin*, by the group of MO labeled, “*grifin*”. The phenotypes measured included: **(A)** the proportion of normal or delayed embryos, **(B)** eye size, and **(C)** lens/eye ratio. *P*-values were determined with **(A)** Fisher’s exact test or **(B, C)** the Mann-Whitney *U*-test. These values are associated with the arched gray lines at the top of each panel which indicate the values that were compared. The numbers of samples used to generate the plots are indicated in parentheses.

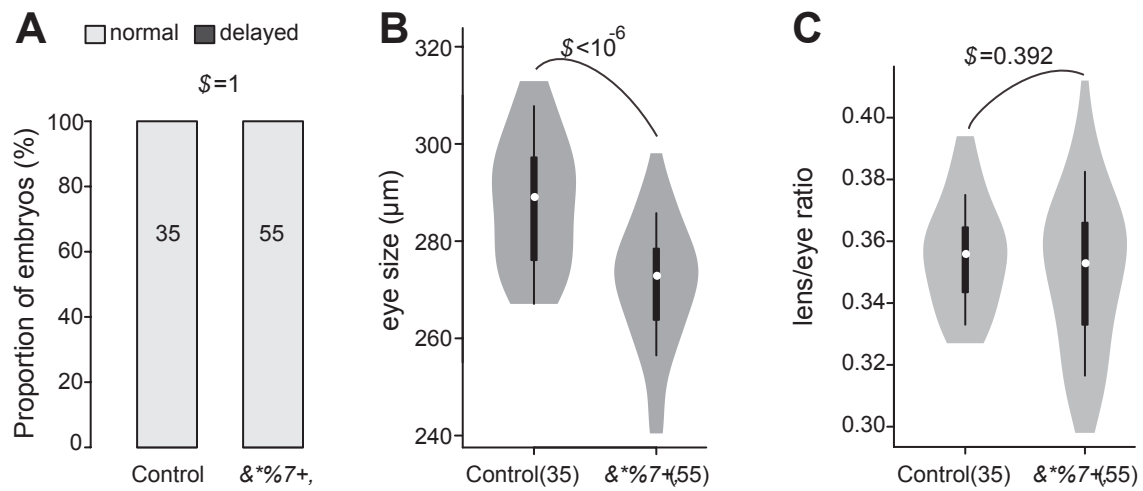

**Figure S17.** Consequences of knocking down the zebrafish ortholog of the mouse gene, *Kcng14*, by the group of MO labeled, “*kcng14*”. The phenotypes measured included: **(A)** the proportion of normal or delayed embryos, **(B)** eye size, and **(C)** lens/eye ratio. *P*-values were determined with **(A)** Fisher’s exact test or **(B, C)** the Mann-Whitney *U*-test. These values are associated with the arched gray lines at the top of each panel which indicate the values that were compared. The numbers of samples used to generate the plots are indicated in parentheses.

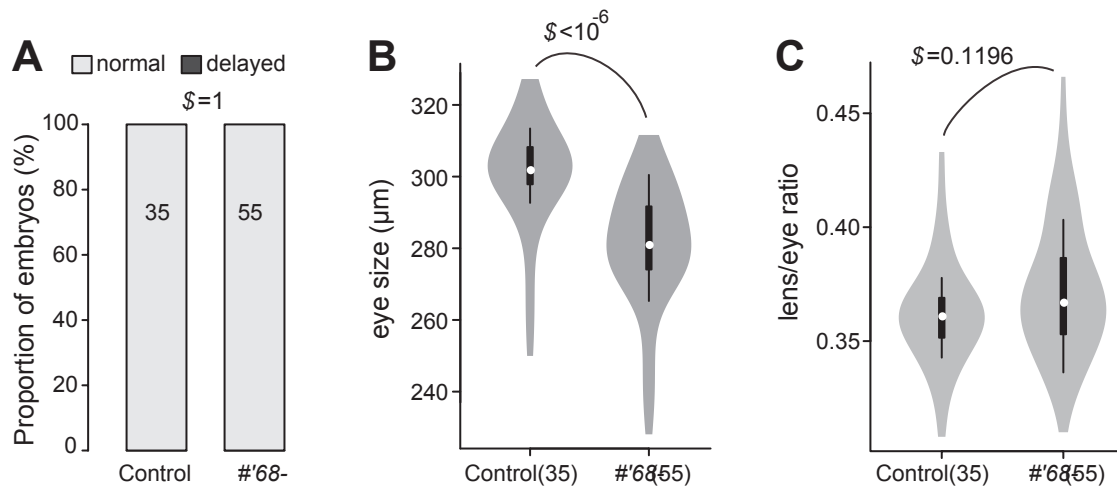

**Figure S18.** Consequences of knocking down the zebrafish ortholog of the mouse gene, *Lrit2*, by the group of MO labeled, “*Lrit2*”. The phenotypes measured included: **(A)** the proportion of normal or delayed embryos, **(B)** eye size, and **(C)** lens/eye ratio. *P*-values were determined with **(A)** Fisher’s exact test or **(B, C)** the Mann-Whitney *U*-test. These values are associated with the arched gray lines at the top of each panel which indicate the values that were compared. The numbers of samples used to generate the plots are indicated in parentheses.

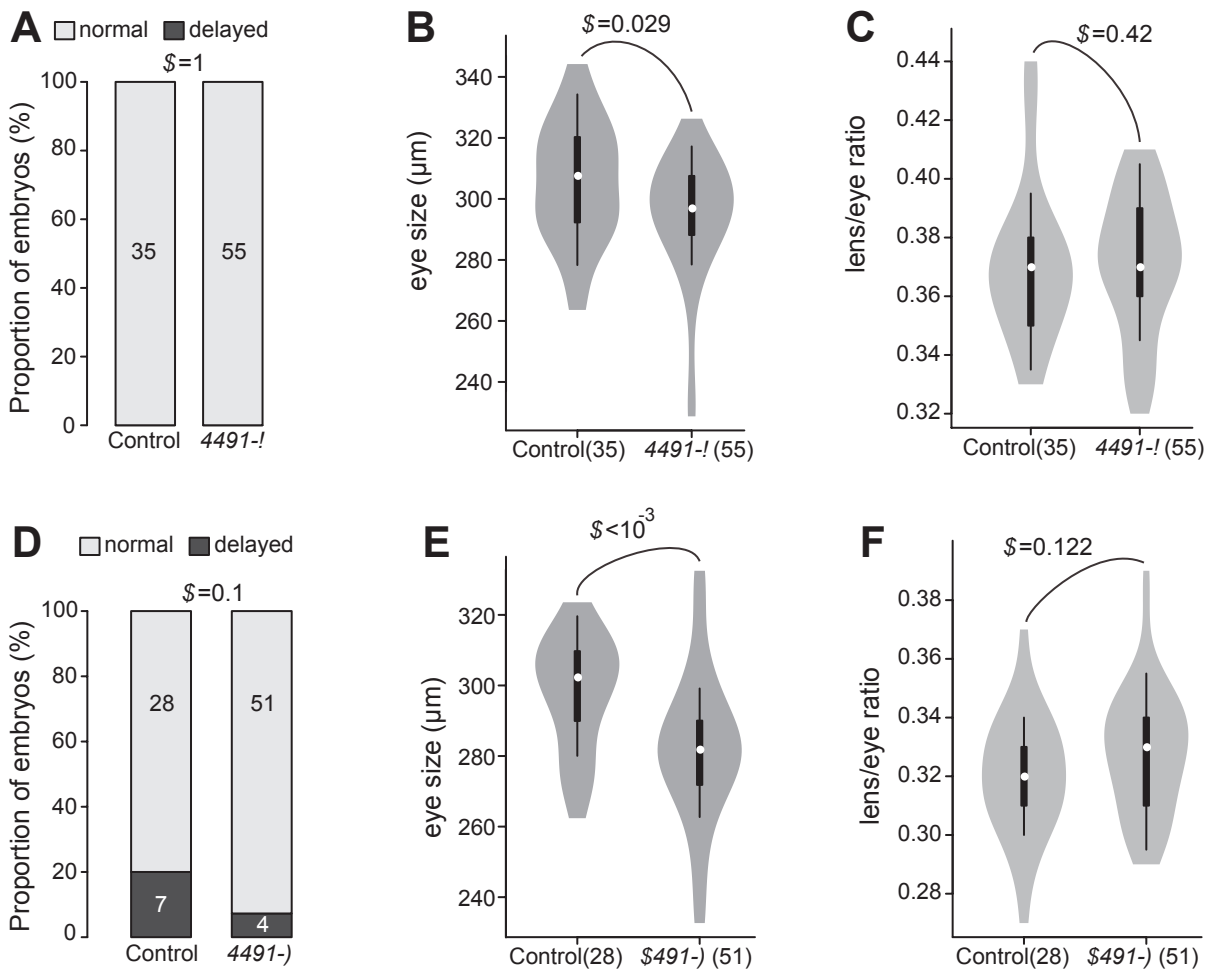

**Figure S19.** Consequences of knocking down the zebrafish orthologs of the mouse gene, *Ppef2*, by the groups of MO labeled “*ppef2a*” (A-C) and “*ppef2b*” (D-F). The phenotypes measured included: (A,D) the proportion of normal or delayed embryos, (B,E) eye size, and (C,F) lens/eye ratio. *P*-values were determined with (A,D) Fisher’s exact test or (B, C, E, F) the Mann-Whitney *U*-test. These values are associated with the arched gray lines at the top of each panel which indicate the values that were compared. The numbers of samples used to generate the plots are indicated in parentheses.



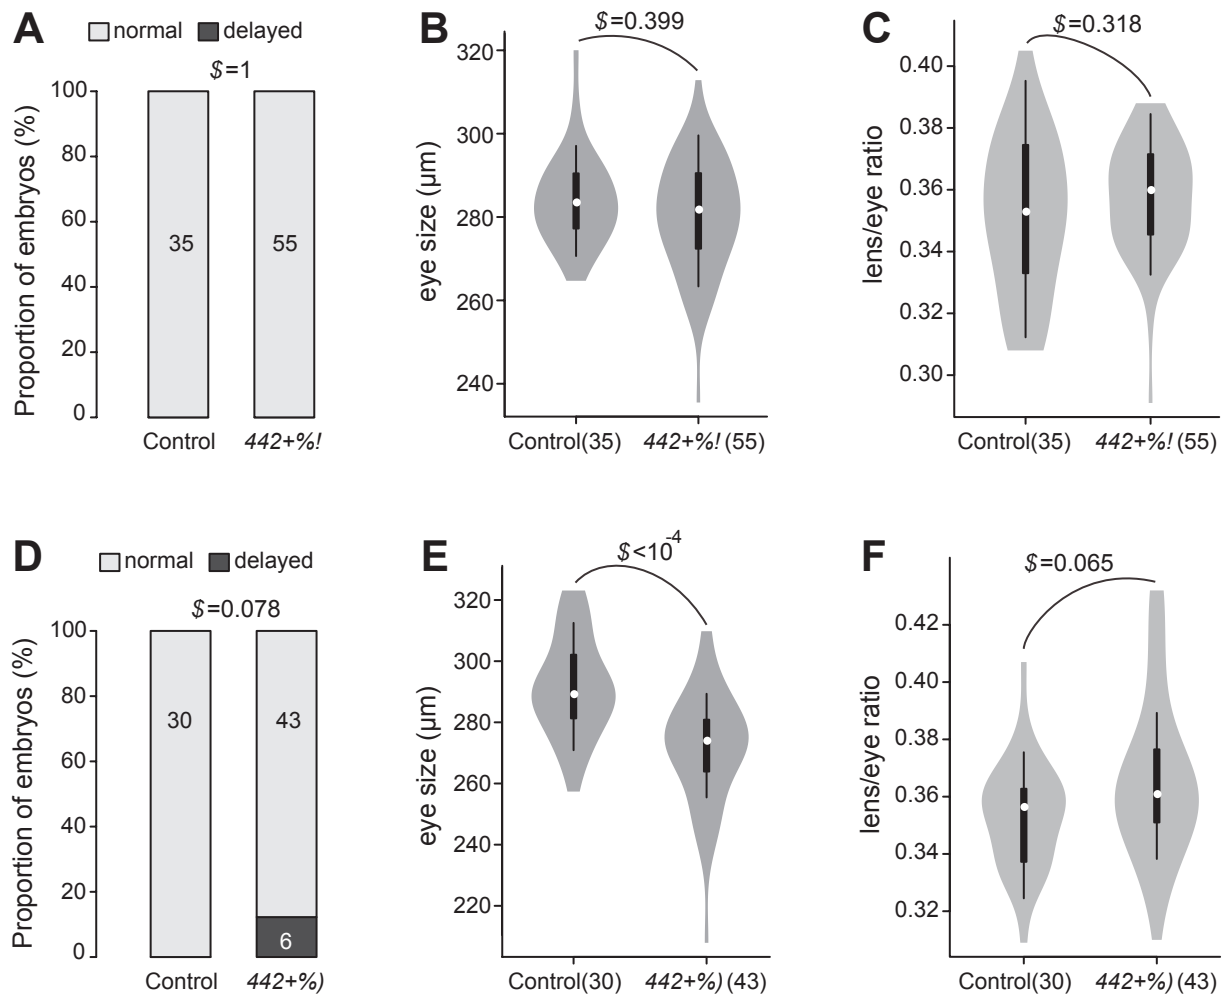

**Figure S20.** Consequences of knocking down the zebrafish orthologs of the mouse gene, *Ppm1n*, by the groups of MO labeled “*ppm1na*” (A-C) and “*ppm1nb*” (D-F). The phenotypes measured included: (A, D) the proportion of normal or delayed embryos, (B, E) eye size, and (C, F) lens/eye ratio. *P*-values were determined with (A, D) Fisher’s exact test or (B, C, E, F) the Mann-Whitney *U*-test. These values are associated with the arched gray lines at the top of each panel which indicate the values that were compared. The numbers of samples used to generate the plots are indicated in parentheses.

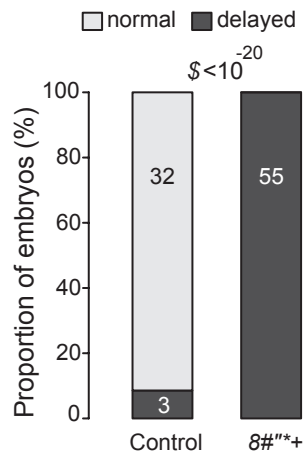

**Figure S21.** Consequences of knocking down the zebrafish ortholog of the mouse gene, *Tldc1*, by the group of MO labeled, “*tldc1*”. All MO-injected embryos showed developmental delay. Because only embryos developing at a normal speed were examined for the eye phenotypes, no comparison in eye morphology between the MO and the control groups was conducted. *P*-values were determined with Fisher’s exact test. The numbers of samples used to generate the plots are indicated in parentheses.

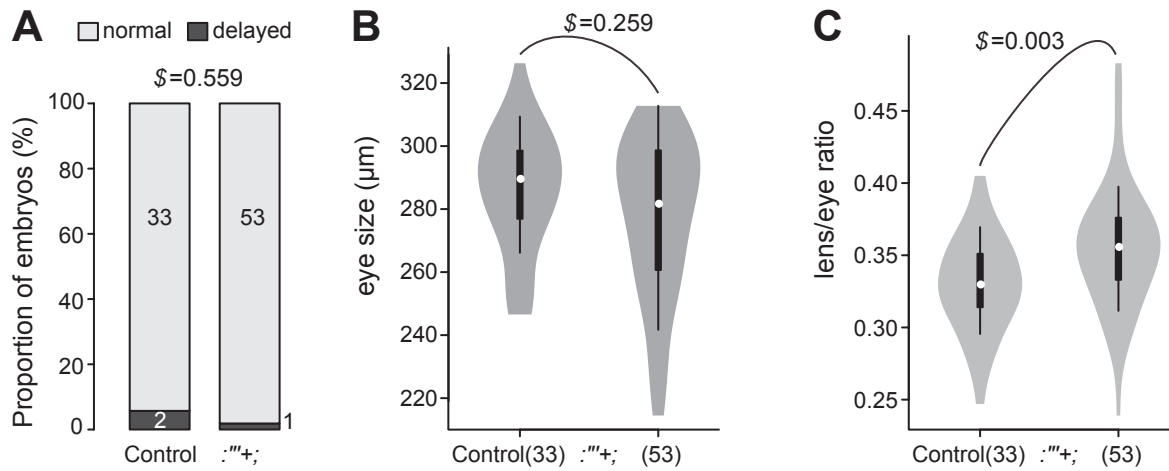

**Figure S22.** Consequences of knocking down the zebrafish ortholog of the mouse gene, *Wdr17*, by the group of MO labeled, “*wdr17*”. The phenotypes measured included: **(A)** the proportion of normal or delayed embryos, **(B)** eye size, and **(C)** lens/eye ratio. *P*-values were determined with **(A)** Fisher’s exact test or **(B, C)** the Mann-Whitney *U*-test. These values are associated with the arched gray lines at the top of each panel which indicate the values that were compared. The numbers of samples used to generate the plots are indicated in parentheses.

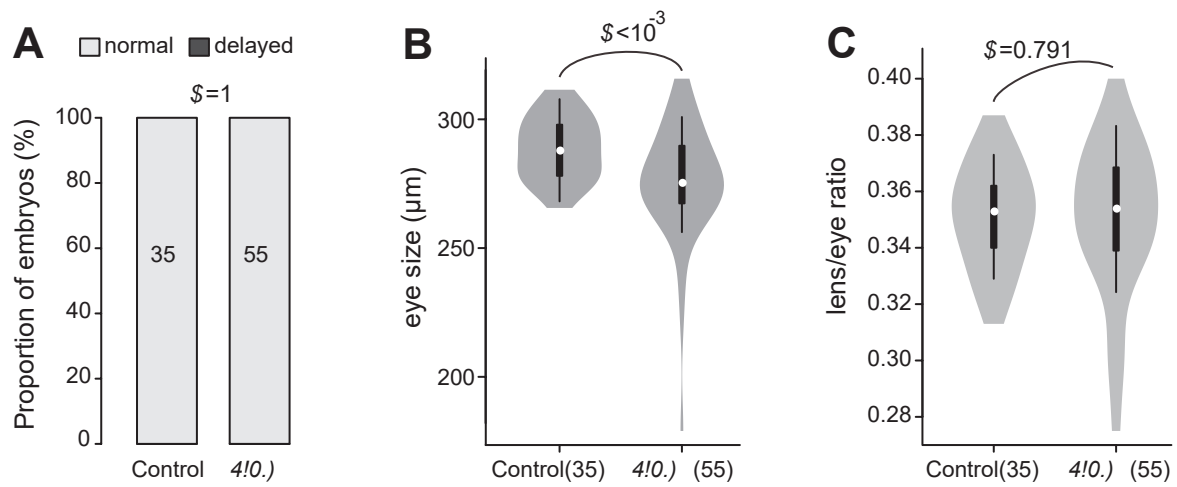

**Figure S23.** Consequences of knocking down the zebrafish ortholog of the mouse gene, *Pax6b*, by the group of MO labeled, “*pax6b*”. The phenotypes measured included: **(A)** the proportion of normal or delayed embryos, **(B)** eye size, and **(C)** lens/eye ratio. *P*-values were determined with **(A)** Fisher’s exact test or **(B, C)** the Mann-Whitney *U*-test. These values are associated with the arched gray lines at the top of each panel which indicate the values that were compared. The numbers of samples used to generate the plots are indicated in parentheses.

**Table S1.** The list of tissues whose transcriptomes were profiled by the microarray platform GNF1M and were used to construct the GNF1M-based gene coexpression network. Expression signals were obtained from BioGPS (<http://biogps.org/>).

| Label of Tissues/Cells      | Host condition             | GEO Accession <sup>1</sup> |
|-----------------------------|----------------------------|----------------------------|
| Osteoblasts_day5            | Adult (8- to 10-week-old)  | GSM286389; GSM286390       |
| Osteoblasts_day14           | Adult (8- to 10-week-old)  | GSM286391; GSM286392       |
| Osteoblasts_day21           | Adult (8- to 10-week-old)  | GSM286393; GSM286394       |
| Osteoclasts                 | Adult (8- to 10-week-old)  | GSM286395; GSM286396       |
| Macrophage_unstimulated     | Adult (8- to 10-week-old)  | GSM286397; GSM286398       |
| Macrophage_1hrtps           | Adult (8- to 10-week-old)  | GSM286399; GSM286400       |
| Macrophage_7hrtps           | Adult (8- to 10-week-old)  | GSM286401; GSM286402       |
| Mast cells                  | Adult (8- to 10-week-old)  | GSM286403; GSM286404       |
| Septal organ                | Unspecified                | -                          |
| Septum (resp epith)         | Unspecified                | -                          |
| Neuro2a                     | Unspecified                | -                          |
| Embryonic stem feeder layer | Unspecified                | -                          |
| Embryonic stem no feeder    | Unspecified                | -                          |
| Nih 3T3                     | Adult (8- to 10-week-old)  | -                          |
| M-1                         | Adult (8- to 10-week-old)  | -                          |
| C2c12                       | Adult (8- to 10-week-old)  | -                          |
| Cerebellum                  | Adult (10- to 12-week-old) | GSM18606; GSM18607         |
| Lymphnode                   | Adult (10- to 12-week-old) | GSM18616; GSM18617         |
| Uterus                      | Adult (10- to 12-week-old) | GSM18620; GSM18621         |
| Heart                       | Adult (10- to 12-week-old) | GSM18678; GSM18679         |
| Testis                      | Adult (10- to 12-week-old) | GSM18704; GSM18705         |
| Adipose tissue              | Adult (10- to 12-week-old) | GSM18624; GSM18625         |
| Adrenal gland               | Adult (10- to 12-week-old) | GSM18626; GSM18627         |
| Bladder                     | Adult (10- to 12-week-old) | GSM18628; GSM18629         |
| Kidney                      | Adult (10- to 12-week-old) | GSM18688; GSM18689         |
| Liver                       | Adult (10- to 12-week-old) | GSM18696; GSM18697         |
| Dorsal striatum             | Adult (10- to 12-week-old) | GSM18600; GSM18601         |
| Cerebral cortex             | Adult (10- to 12-week-old) | GSM18596                   |
| Frontal cortex              | Adult (10- to 12-week-old) | GSM18594; GSM18595         |
| Hippocampus                 | Adult (10- to 12-week-old) | GSM18602; GSM18603         |
| Prostate                    | Adult (10- to 12-week-old) | GSM18650; GSM18651         |
| Salivary gland              | Adult (10- to 12-week-old) | GSM18692; GSM18693         |
| Epidermis                   | Adult (10- to 12-week-old) | GSM18640; GSM18641         |
| Umbilical cord              | Adult (10- to 12-week-old) | GSM18656; GSM18657         |
| Olfactory bulb              | Adult (10- to 12-week-old) | GSM18604; GSM18605         |
| Substantia nigra            | Adult (10- to 12-week-old) | GSM18584; GSM18585         |
| Bone                        | Adult (10- to 12-week-old) | GSM18664; GSM18665         |
| Large intestine             | Adult (10- to 12-week-old) | GSM18660; GSM18661         |
| Spleen                      | Adult (10- to 12-week-old) | GSM18666; GSM18667         |
| Pituitary                   | Adult (10- to 12-week-old) | GSM18612; GSM18613         |
| Vomerolnasal organ.VMO.     | Adult (10- to 12-week-old) | GSM18652; GSM18653         |
| Medial olfactory epithelium | Adult (10- to 12-week-old) | GSM18648; GSM18649         |
| Dorsal root ganglion        | Adult (10- to 12-week-old) | GSM18610; GSM18611         |
| Placenta                    | Adult (10- to 12-week-old) | GSM18682; GSM18683         |
| Cd4.Tcell                   | Developing embryos         | GSM18672; GSM18673         |
| Cd8.Tcell                   | Developing embryos         | GSM18674; GSM18675         |
| B220.bcell                  | Developing embryos         | GSM18670; GSM18671         |
| Lung                        | Adult (10- to 12-week-old) | GSM18654; GSM18655         |
| Eye                         | Adult (10- to 12-week-old) | GSM18614; GSM18615         |
| Amygdala                    | Adult (10- to 12-week-old) | GSM18598; GSM18599         |
| Thyroid                     | Adult (10- to 12-week-old) | GSM18694; GSM18695         |
| Trigeminal                  | Adult (10- to 12-week-old) | GSM18608; GSM18609         |
| Small intestine             | Adult (10- to 12-week-old) | GSM18690; GSM18691         |
| Stomach                     | Adult (10- to 12-week-old) | GSM18658; GSM18659         |
| Hypothalamus                | Adult (10- to 12-week-old) | GSM18590; GSM18591         |
| Spinal cord lower           | Adult (10- to 12-week-old) | GSM18588; GSM18589         |

|                     |                            |                    |
|---------------------|----------------------------|--------------------|
| Spinal cord upper   | Adult (10- to 12-week-old) | GSM18586; GSM18587 |
| Pancreas            | Adult (10- to 12-week-old) | GSM18702; GSM18703 |
| Brown fat           | Adult (10- to 12-week-old) | GSM18676; GSM18677 |
| Mammary gland.lact. | Adult (10- to 12-week-old) | GSM18684; GSM18685 |
| Embryoday6.5        | Developing embryos         | GSM18638; GSM18639 |
| Embryoday7.5        | Developing embryos         | GSM18636; GSM18637 |
| Embryoday8.5        | Developing embryos         | GSM18634; GSM18635 |
| Embryoday9.5        | Developing embryos         | GSM18632; GSM18633 |
| Fertilizedegg       | Adult (10- to 12-week-old) | GSM18698; GSM18699 |
| Oocyte              | Adult (10- to 12-week-old) | GSM18700; GSM18701 |
| Blastocysts         | Adult (10- to 12-week-old) | GSM18686; GSM18687 |
| Embryoday10.5       | Developing embryos         | GSM18630; GSM18631 |
| Digits              | Adult (10- to 12-week-old) | GSM18642; GSM18643 |
| Snoutepidermis      | Adult (10- to 12-week-old) | GSM18644; GSM18645 |
| Thymus              | Adult (10- to 12-week-old) | GSM18668; GSM18669 |
| Tongueepidermis     | Adult (10- to 12-week-old) | GSM18646; GSM18647 |
| Trachea             | Adult (10- to 12-week-old) | GSM18618; GSM18619 |
| Cortex              | Adult (10- to 12-week-old) | GSM18597           |
| Ovary               | Adult (10- to 12-week-old) | GSM18622; GSM18623 |
| Skeletal muscle     | Adult (10- to 12-week-old) | GSM18680; GSM18681 |
| Bonemarrow          | Adult (10- to 12-week-old) | GSM18662; GSM18663 |
| Preoptic            | Adult (10- to 12-week-old) | GSM18592; GSM18593 |

<sup>1</sup> Equivalent data source at NCBI GEO: <https://www.ncbi.nlm.nih.gov/geo/>

**Table S2.** The list of tissues whose transcriptomes were profiled by the microarray platform MOE430 2.0 and were used to construct the MOE430-based gene coexpression network. Expression signals were obtained from BioGPS (<http://biogps.org/>).

| Label of Tissues/Cells         | Host condition            | GEO Accession <sup>1</sup> |
|--------------------------------|---------------------------|----------------------------|
| 3T3-L1                         | Adult (8- to 10-week-old) | GSM258609; GSM258610       |
| B-cells_GL7_negative_KLH       | Developing embryos        | -                          |
| B-cells_GL7_positive_Alum      | Unspecified               | -                          |
| B-cells_GL7_positive_KLH       | Unspecified               | -                          |
| B-cells_GL7negative_Alum       | Unspecified               | -                          |
| B-cells_marginal_zone          | Adult (8- to 10-week-old) | GSM258621; GSM258622       |
| BAF3                           | Adult (8- to 10-week-old) | GSM258619; GSM258620       |
| C2C12                          | Adult (8- to 10-week-old) | GSM258629; GSM258630       |
| C3H_10T1_2                     | Adult (8- to 10-week-old) | GSM258631; GSM258632       |
| MEF                            |                           |                            |
| NK_cells                       | Adult (8- to 10-week-old) | GSM258731; GSM258732       |
| Raw_264_7                      | Adult (8- to 10-week-old) | GSM258755; GSM258756       |
| T-cells_CD4+                   | Adult (8- to 10-week-old) | GSM258773; GSM258774       |
| T-cells_CD8+                   | Adult (8- to 10-week-old) | GSM258775; GSM258776       |
| T-cells_foxp3+                 | Adult (8- to 10-week-old) | GSM258777; GSM258778       |
| Adipose_brown                  | Adult (8- to 10-week-old) | GSM258611; GSM258612       |
| Adipose_white                  | Adult (8- to 10-week-old) | GSM258613; GSM258614       |
| Adrenal_gland                  | Adult (8- to 10-week-old) | GSM258615; GSM258616       |
| Amygdala                       | Adult (8- to 10-week-old) | GSM258617; GSM258618       |
| Bladder                        | Adult (8- to 10-week-old) | GSM258623; GSM258624       |
| Bone                           | Adult (8- to 10-week-old) | GSM258625; GSM258626       |
| Bone_marrow                    | Adult (8- to 10-week-old) | GSM258627; GSM258628       |
| Cerebellum                     | Adult (8- to 10-week-old) | GSM258633; GSM258634       |
| Cerebral_cortex                | Adult (8- to 10-week-old) | GSM258635; GSM258636       |
| Cerebral_cortex_prefrontal     | Adult (8- to 10-week-old) | GSM258637; GSM258638       |
| Ciliary_bodies                 | Adult (8- to 10-week-old) | GSM258639; GSM258640       |
| Common_myeloid_progenitor      | Adult (8- to 10-week-old) | GSM258641; GSM258642       |
| Cornea                         | Adult (8- to 10-week-old) | GSM258643; GSM258644       |
| Dendritic_cells_lymphoid_CD8a+ | Adult (8- to 10-week-old) | GSM258645; GSM258646       |
| Dendritic_cells_myeloid_CD8a-  | Adult (8- to 10-week-old) | GSM258647; GSM258648       |
| Dendritic_plasmacytoid_B220+   | Adult (8- to 10-week-old) | GSM258649; GSM258650       |
| Dorsal_root_ganglia            | Adult (8- to 10-week-old) | GSM258651; GSM258652       |
| Dorsal_striatum                | Adult (8- to 10-week-old) | GSM258653; GSM258654       |
| Embryonic_stem_line_Bruce4_p13 | Adult (8- to 10-week-old) | GSM258655; GSM258656       |
| Embryonic_stem_line_V26_2_p16  | Adult (8- to 10-week-old) | GSM258657; GSM258658       |
| Epidermis                      | Adult (8- to 10-week-old) | GSM258659; GSM258660       |
| Eyecup                         | Adult (8- to 10-week-old) | GSM258661; GSM258662       |
| Follicular_B-cells             | Adult (8- to 10-week-old) | GSM258663; GSM258664       |
| Granulo_mono_progenitor        | Adult (8- to 10-week-old) | GSM258665; GSM258666       |
| Granulocytes_mac1+gr1+         | Adult (8- to 10-week-old) | GSM258667; GSM258668       |
| Heart                          | Adult (8- to 10-week-old) | GSM258669; GSM258670       |
| Hippocampus                    | Adult (8- to 10-week-old) | GSM258671; GSM258672       |
| Hypothalamus                   | Adult (8- to 10-week-old) | GSM258673; GSM258674       |
| Intestine_large                | Adult (8- to 10-week-old) | GSM258675; GSM258676       |
| Intestine_small                | Adult (8- to 10-week-old) | GSM258677; GSM258678       |
| Iris                           | Adult (8- to 10-week-old) | GSM258679; GSM258680       |
| Kidney                         | Adult (8- to 10-week-old) | GSM258681; GSM258682       |
| Lacrimal_gland                 | Adult (8- to 10-week-old) | GSM258683; GSM258684       |
| Lens                           | Adult (8- to 10-week-old) | GSM258685; GSM258686       |
| Liver                          | Adult (8- to 10-week-old) | GSM258687; GSM258688       |
| Lung                           | Adult (8- to 10-week-old) | GSM258689; GSM258690       |
| Lymph_nodes                    | Adult (8- to 10-week-old) | GSM258691; GSM258692       |
| Mimcd-3                        | Adult (8- to 10-week-old) | GSM258723; GSM258724       |
| Macrophage_bone_marrow_0hr     | Adult (8- to 10-week-old) | GSM258693; GSM258694       |
| Macrophage_bone_marrow_24h_LPS | Adult (8- to 10-week-old) | GSM258695; GSM258696       |

|                                |                           |                      |
|--------------------------------|---------------------------|----------------------|
| Macrophage_bone_marrow_2hr_LPS | Adult (8- to 10-week-old) | GSM258697; GSM258698 |
| Macrophage_bone_marrow_6hr_LPS | Adult (8- to 10-week-old) | GSM258699; GSM258700 |
| Macrophage_peri_LPS_thio_0hrs  | Adult (8- to 10-week-old) | GSM258701; GSM258702 |
| Macrophage_peri_LPS_thio_1hrs  | Adult (8- to 10-week-old) | GSM258703; GSM258704 |
| Macrophage_peri_LPS_thio_7hrs  | Adult (8- to 10-week-old) | GSM258705; GSM258706 |
| Mammary_gland__lact            | Adult (8- to 10-week-old) | GSM258707; GSM258708 |
| Mammary_gland_non-lactating    | Adult (8- to 10-week-old) | GSM258709; GSM258710 |
| Mast_cells                     | Adult (8- to 10-week-old) | GSM258711; GSM258712 |
| Mast_cells_ige                 | Adult (8- to 10-week-old) | GSM258713; GSM258714 |
| Mast_cells_ige+antigen_1hr     | Adult (8- to 10-week-old) | GSM258715; GSM258716 |
| Mast_cells_ige+antigen_6hr     | Adult (8- to 10-week-old) | GSM258717; GSM258718 |
| Mega_erythrocyte_progenitor    | Adult (8- to 10-week-old) | GSM258719; GSM258720 |
| Microglia                      | Adult (8- to 10-week-old) | GSM258721; GSM258722 |
| MIN6                           | Adult (8- to 10-week-old) | GSM258725; GSM258726 |
| Neuro2a                        | Adult (8- to 10-week-old) | GSM258727; GSM258728 |
| NIH_3T3                        | Adult (8- to 10-week-old) | GSM258729; GSM258730 |
| Nucleus_accumbens              | Adult (8- to 10-week-old) | GSM258733; GSM258734 |
| Olfactory_bulb                 | Adult (8- to 10-week-old) | GSM258735; GSM258736 |
| Osteoblast_day14               | Adult (8- to 10-week-old) | GSM258737; GSM258738 |
| Osteoblast_day21               | Adult (8- to 10-week-old) | GSM258739; GSM258740 |
| Osteoblast_day5                | Adult (8- to 10-week-old) | GSM258741; GSM258742 |
| Osteoclasts                    | Adult (8- to 10-week-old) | GSM258743; GSM258744 |
| Ovary                          | Adult (8- to 10-week-old) | GSM258745; GSM258746 |
| Pancreas                       | Adult (8- to 10-week-old) | GSM258747; GSM258748 |
| Pituitary                      | Adult (8- to 10-week-old) | GSM258749; GSM258750 |
| Placenta                       | Adult (8- to 10-week-old) | GSM258751; GSM258752 |
| Prostate                       | Adult (8- to 10-week-old) | GSM258753; GSM258754 |
| Eye                            | Adult (8- to 10-week-old) | GSM258757; GSM258758 |
| Eye_pigment_epithelium         | Adult (8- to 10-week-old) | GSM258759; GSM258760 |
| Salivary_gland                 | Adult (8- to 10-week-old) | GSM258761; GSM258762 |
| Skeletal_muscle                | Adult (8- to 10-week-old) | GSM258763; GSM258764 |
| Spinal_cord                    | Adult (8- to 10-week-old) | GSM258765; GSM258766 |
| Spleen                         | Adult (8- to 10-week-old) | GSM258767; GSM258768 |
| Stem_cells__HSC                | Adult (8- to 10-week-old) | GSM258769; GSM258770 |
| Stomach                        | Adult (8- to 10-week-old) | GSM258771; GSM258772 |
| Testis                         | Adult (8- to 10-week-old) | GSM258779; GSM258780 |
| Thymocyte_DP_CD4+CD8+          | Adult (8- to 10-week-old) | GSM258781; GSM258782 |
| Thymocyte_SP_CD4+              | Adult (8- to 10-week-old) | GSM258783; GSM258784 |
| Thymocyte_SP_CD8+              | Adult (8- to 10-week-old) | GSM258785; GSM258786 |
| Umbilical_cord                 | Adult (8- to 10-week-old) | GSM258787; GSM258788 |
| Uterus                         | Adult (8- to 10-week-old) | GSM258789; GSM258790 |

<sup>1</sup> Equivalent data source at NCBI GEO: <https://www.ncbi.nlm.nih.gov/geo/>



**Table S3.** The list of tissues whose transcriptomes were profiled by the RNA-seq and were used to construct the RNA-seq-based gene coexpression network. Expression signals were processed and normalized as described in Materials and Methods.

| Label of Tissues/Cells      | Host condition             | GEO Accession <sup>1</sup>                                                                                 |
|-----------------------------|----------------------------|------------------------------------------------------------------------------------------------------------|
| Adrenal                     | Adult (8-week-old)         | GSM900188                                                                                                  |
| Bladder                     | Adult (8-week-old)         | GSM1000564                                                                                                 |
| Cerebellum                  | Adult (8-week-old)         | GSM1000567                                                                                                 |
| CNS115                      | E11.5 embryo               | GSM1000573                                                                                                 |
| CNS14                       | E14 embryo                 | GSM1000569                                                                                                 |
| CNS18                       | E18 embryo                 | GSM1000570                                                                                                 |
| Colon                       | Adult (8-week-old)         | GSM900198                                                                                                  |
| Cortex                      | Adult (8-week-old)         | GSM1000563                                                                                                 |
| Duodenum                    | Adult (8-week-old)         | GSM900187                                                                                                  |
| Frontallobe                 | Adult (8-week-old)         | GSM1000562                                                                                                 |
| Genital Fat Pad             | Adult (8-week-old)         | GSM900190                                                                                                  |
| Heart                       | Adult (8-week-old)         | GSM900199                                                                                                  |
| Kidney                      | Adult (8-week-old)         | GSM900194                                                                                                  |
| Large Intestine             | Adult (8-week-old)         | GSM900189                                                                                                  |
| LimbE145                    | E14.5 embryo               | GSM1000568                                                                                                 |
| Liver                       | Adult (8-week-old)         | GSM900195                                                                                                  |
| LiverE14                    | E14 embryo                 | GSM1000574                                                                                                 |
| LiverE145                   | E14.5 embryo               | GSM1000571                                                                                                 |
| LiverE18                    | E18 embryo                 | GSM1000566                                                                                                 |
| Lung                        | Adult (8-week-old)         | GSM900196                                                                                                  |
| Mammary Gland               | Adult (8-week-old)         | GSM900184                                                                                                  |
| Ovary                       | Adult (8-week-old)         | GSM900183                                                                                                  |
| Placenta                    | Adult (8-week-old)         | GSM1000565                                                                                                 |
| Subcutaneous Fat Pad        | Adult (8-week-old)         | GSM900191                                                                                                  |
| Small Intestine             | Adult (8-week-old)         | GSM900186                                                                                                  |
| Spleen                      | Adult (8-week-old)         | GSM900197                                                                                                  |
| Stomach                     | Adult (8-week-old)         | GSM900185                                                                                                  |
| Testis                      | Adult (8-week-old)         | GSM900193                                                                                                  |
| Thymus                      | Adult (8-week-old)         | GSM900192                                                                                                  |
| Whole brain E14.5           | E14.5 embryo               | GSM1000572                                                                                                 |
| Eye                         | 4-week-old                 | GSM737550                                                                                                  |
| Spinal cord                 | Adult (10- to 16-week-old) | GSM1103369; GSM1103370                                                                                     |
| Dorsal root ganglia         | -                          | GSM1150934; GSM1150935; GSM1150936                                                                         |
| Trigeminal                  | -                          | GSM1150931; GSM1150932; GSM1150933                                                                         |
| Adipose tissue              | 1-week-old                 | GSM1321366; GSM1321367; GSM1321368; GSM1321369; GSM1321370; GSM1321371; GSM1321372; GSM1321373             |
| Skeletal muscle             | -                          | GSM1322910; GSM1322911; GSM1322912                                                                         |
| Brown fat                   | Adult (3-month-old)        | GSM1359961; GSM1359962; GSM1359963                                                                         |
| Medial olfactory epithelium | Adult (age unspecified)    | GSE57567                                                                                                   |
| Hippocampus                 | Adult (3-month-old)        | GSM1517288; GSM1517289; GSM1517290; GSM1517291; GSM1517292                                                 |
| Tongue                      | Adult (31-week-old)        | GSM1520071; GSM1520072; GSM1520073                                                                         |
| Substantia nigra            | -                          | GSM1571336; GSM1571337; GSM1571338; GSM1571339; GSM1571340; GSM1571341                                     |
| Pancreas                    | 10-14 weeks                | GSM1660657; GSM1660658; GSM1660659                                                                         |
| Uterus                      | Adult (day 8 of pregnancy) | GSM1690181; GSM1690182                                                                                     |
| Oocyte                      | 5- to 20-day-old           | GSM1717218; GSM1717219                                                                                     |
| Hypothalamus                | Adult (10- to 12-week-old) | GSM1855239; GSM1855240; GSM1855241; GSM1855242; GSM1855243; GSM1855244; GSM1855245; GSM1855246; GSM1855247 |
| Amygdala                    | Adult (age unspecified)    | GSM1924705; GSM1924706; GSM1924707                                                                         |

|                 |                            |                                                                           |
|-----------------|----------------------------|---------------------------------------------------------------------------|
| Prostate        | Adult (4-month-old)        | GSM2152244; GSM2152245; GSM2152246;<br>GSM2152247; GSM2152248; GSM2152249 |
| Olfactory bulb  | Adult (age unspecified)    | GSM1100706                                                                |
| Epidermis       | Adult (10-week-old)        | GSM1410794                                                                |
| Lymph node      | Adult (10- to 12-week-old) | GSM1680970                                                                |
| Thyroid         | Adult (6-month-old)        | GSM652441                                                                 |
| Bone marrow     | Adult (8-week-old)         | GSM723767                                                                 |
| Dorsal striatum | Adult (3-month-old)        | GSM884357                                                                 |

<sup>1</sup> Data available from the NCBI GEO: <https://www.ncbi.nlm.nih.gov/geo/>

**Table S4.** The 47 mouse tissues used to functionally annotate gene modules and their corresponding tissue names, presented as MA codes, in MGI for the records of mutant strain phenotyping. The substructures of each tissue (in MA codes) and the associated phenotypic codes (in MP IDs) are provided as Dataset S1.

| #  | Tissue                       | Tissue name (MA code) in MGI                   |
|----|------------------------------|------------------------------------------------|
| 1  | Adipose tissue               | Adipose tissue (MA:0000009)                    |
| 2  | Adrenal gland                | Adrenal gland (MA:0000116)                     |
| 3  | Amygdala                     | Amygdala (MA:0000887)                          |
| 4  | Bladder                      | Urinary bladder (MA:0000380)                   |
| 5  | Bone                         | Bone (MA:0001459)                              |
| 6  | Bone marrow                  | Bone marrow (MA:0000134)                       |
| 7  | Brown fat                    | Brown adipose tissue (MA:0000057)              |
| 8  | Cerebellum                   | Cerebellum (MA:0000198)                        |
| 9  | Cerebral cortex              | Cerebral cortex (MA:0000185)                   |
| 10 | Digits                       | Limb digit (MA:0000690)                        |
| 11 | Dorsal root ganglia          | Dorsal root ganglion (MA:0000232)              |
| 12 | Dorsal striatum              | Dorsal striatum (MA:0002971)                   |
| 13 | Epidermis                    | Epidermis (MA:0000153)                         |
| 14 | Eye                          | Eye (MA:0000261)                               |
| 15 | Frontal cortex               | Frontal cortex (MA:0000905)                    |
| 16 | Heart                        | Heart (MA:0000072)                             |
| 17 | Hippocampus                  | Hippocampus (MA:0000191)                       |
| 18 | Hypothalamus                 | Hypothalamus (MA:0000173)                      |
| 19 | Kidney                       | Kidney (MA:0000368)                            |
| 20 | Large intestine              | Large intestine (MA:0000333)                   |
| 21 | Liver                        | Liver (MA:0000358)                             |
| 22 | Lung                         | Lung (MA:0000415)                              |
| 23 | Lymph node                   | Lymph node (MA:0000139)                        |
| 24 | Mammary gland                | Mammary gland (MA:0000145)                     |
| 25 | Medial olfactory epithelium  | Nasal cavity olfactory epithelium (MA:0001325) |
| 26 | Olfactory bulb               | Main olfactory bulb (MA:0000194)               |
| 27 | Oocyte                       | Oocyte (MA:0000388)                            |
| 28 | Ovary                        | Ovary (MA:0000384)                             |
| 29 | Pancreas                     | Pancreas (MA:0000120)                          |
| 30 | Pituitary                    | Pituitary gland (MA:0000176)                   |
| 31 | Placenta                     | Placenta (MA:0000386)                          |
| 32 | Prostate                     | Prostate gland (MA:0000404)                    |
| 33 | Salivary gland               | Salivary gland (MA:0000346)                    |
| 34 | Skeletal muscle              | Skeletal muscle tissue (MA:0002439)            |
| 35 | Small intestine              | Small intestine (MA:0000337)                   |
| 36 | Spinal cord, lower and upper | Spinal cord (MA:0000216)                       |
| 37 | Spleen                       | Spleen (MA:0000141)                            |
| 38 | Stomach                      | Stomach (MA:0000353)                           |
| 39 | Substantia nigra             | Substantia nigra (MA:0000210)                  |
| 40 | Testis                       | Testis (MA:0000411)                            |
| 41 | Thymus                       | Thymus (MA:0000142)                            |
| 42 | Thyroid                      | Thyroid gland (MA:0000129)                     |
| 43 | Tongue                       | Tongue (MA:0000347)                            |
| 44 | Trachea                      | Trachea (MA:0000441)                           |
| 45 | Trigeminal                   | Trigeminal V nerve (MA:0001100)                |
| 46 | Uterus                       | Uterus (MA:0000389)                            |
| 47 | Vomer nasal organ            | Vomer nasal organ (MA:0000289)                 |

**Table S5.** Gene modules in the GNF1M-based coexpression network and the associated tissue identified by enrichment analysis based on mutant phenotypes for each module. The graph of the modular structures is presented as Figure S3.

| Module ID | Number of genes | Number of phenotyped genes | Associated tissue type ( $\rho$ value)                                                                                                            |
|-----------|-----------------|----------------------------|---------------------------------------------------------------------------------------------------------------------------------------------------|
| 1         | 2584            | 620                        |                                                                                                                                                   |
| 2         | 1475            | 348                        | ovary ( $<10^{-3}$ )                                                                                                                              |
| 3         | 1444            | 208                        | testis ( $<10^{-23}$ ); oocyte ( $<10^{-6}$ )                                                                                                     |
| 4         | 842             | 216                        | hippocampus ( $<10^{-13}$ ); cerebral cortex ( $<10^{-6}$ ); cerebellum ( $<10^{-6}$ ); frontal cortex ( $<10^{-3}$ ); spinal cord ( $<10^{-3}$ ) |
| 5         | 837             | 163                        | placenta ( $<10^{-6}$ ); testis ( $<10^{-3}$ )                                                                                                    |
| 6         | 591             | 201                        | spleen ( $<10^{-7}$ )                                                                                                                             |
| 7         | 468             | 148                        | lymph node ( $<10^{-15}$ ); spleen ( $<10^{-11}$ ); thyroid ( $<10^{-11}$ ); thymus ( $<10^{-11}$ ); bone marrow ( $<10^{-6}$ )                   |
| 8         | 423             | 113                        |                                                                                                                                                   |
| 9         | 393             | 176                        | bone ( $<10^{-5}$ )                                                                                                                               |
| 10        | 372             | 118                        | liver ( $<10^{-18}$ )                                                                                                                             |
| 11        | 271             | 79                         | skeletal muscle ( $<10^{-7}$ ); bone ( $<10^{-2}$ )                                                                                               |
| 12        | 269             | 76                         | kidney ( $<10^{-12}$ )                                                                                                                            |
| 13        | 268             | 87                         | lymph node ( $<10^{-6}$ ); bone marrow ( $<10^{-4}$ ); bone ( $<10^{-3}$ )                                                                        |
| 14        | 252             | 63                         | hypothalamus ( $<10^{-4}$ )                                                                                                                       |
| 15        | 243             | 80                         | bone marrow ( $<10^{-9}$ ); spleen ( $<10^{-4}$ )                                                                                                 |
| 16        | 228             | 63                         | epidermis ( $<10^{-10}$ ); tongue ( $<10^{-3}$ )                                                                                                  |
| 17        | 223             | 52                         | spinal cord ( $<10^{-3}$ )                                                                                                                        |
| 18        | 220             | 62                         | cerebellum ( $<10^{-3}$ ); spinal cord ( $<10^{-3}$ )                                                                                             |
| 19        | 215             | 51                         | medial olfactory epithelium ( $<10^{-5}$ ); olfactory bulb ( $<10^{-5}$ )                                                                         |
| 20        | 213             | 57                         | small intestine ( $<10^{-5}$ )                                                                                                                    |
| 21        | 209             | 67                         | skeletal muscle ( $<10^{-19}$ )                                                                                                                   |
| 22        | 198             | 68                         | spleen ( $<10^{-17}$ ); lymph node ( $<10^{-7}$ )                                                                                                 |
| 23        | 196             | 52                         |                                                                                                                                                   |
| 24        | 193             | 44                         | heart ( $<10^{-14}$ )                                                                                                                             |
| 25        | 185             | 101                        | eye ( $<10^{-37}$ )                                                                                                                               |
| 26        | 183             | 67                         | thymus ( $<10^{-11}$ ); thyroid ( $<10^{-10}$ )                                                                                                   |
| 27        | 181             | 94                         | lung ( $<10^{-7}$ ); heart ( $<10^{-3}$ )                                                                                                         |
| 28        | 164             | 54                         | large intestine ( $<10^{-7}$ )                                                                                                                    |
| 29        | 155             | 48                         |                                                                                                                                                   |
| 30        | 146             | 37                         |                                                                                                                                                   |
| 31        | 137             | 33                         | placenta ( $<10^{-3}$ )                                                                                                                           |
| 32        | 122             | 35                         | cerebellum ( $<10^{-8}$ )                                                                                                                         |
| 33        | 117             | 46                         |                                                                                                                                                   |
| 34        | 104             | 31                         | prostate ( $<10^{-3}$ )                                                                                                                           |
| 35        | 104             | 42                         | adipose tissue ( $<10^{-8}$ ); brown fat ( $<10^{-6}$ ); liver ( $<10^{-4}$ ); pancreas ( $<10^{-3}$ )                                            |
| 36        | 97              | 26                         |                                                                                                                                                   |
| 37        | 95              | 48                         | lung ( $<10^{-4}$ )                                                                                                                               |
| 38        | 87              | 42                         | spleen ( $<10^{-6}$ ); large intestine ( $<10^{-4}$ ); bone ( $<10^{-3}$ ); bone marrow ( $<10^{-3}$ )                                            |
| 39        | 87              | 33                         | adrenal gland ( $<10^{-6}$ )                                                                                                                      |
| 40        | 86              | 27                         | tongue ( $<10^{-3}$ )                                                                                                                             |
| 41        | 84              | 32                         | bone marrow ( $<10^{-5}$ ); bone ( $<10^{-4}$ ); spleen ( $<10^{-3}$ )                                                                            |
| 42        | 76              | 31                         | stomach ( $<10^{-14}$ )                                                                                                                           |
| 43        | 69              | 35                         |                                                                                                                                                   |
| 44        | 69              | 25                         | mammary gland ( $<10^{-10}$ )                                                                                                                     |
| 45        | 69              | 20                         |                                                                                                                                                   |
| 46        | 68              | 16                         |                                                                                                                                                   |
| 47        | 58              | 15                         | brown fat ( $<10^{-4}$ )                                                                                                                          |
| 48        | 55              | 22                         |                                                                                                                                                   |
| 49        | 54              | 21                         |                                                                                                                                                   |
| 50        | 49              | 15                         | vomeronasal organ ( $<10^{-5}$ )                                                                                                                  |

|    |    |    |                                                                               |
|----|----|----|-------------------------------------------------------------------------------|
| 51 | 48 | 19 | pituitary ( $<10^{-8}$ ); uterus ( $<10^{-4}$ ); adrenal gland ( $<10^{-3}$ ) |
| 52 | 40 | 18 | placenta ( $<10^{-5}$ )                                                       |
| 53 | 40 | 8  |                                                                               |
| 54 | 36 | 19 |                                                                               |

**Table S6.** Gene modules in the MOE430-based coexpression network and the associated tissue identified by enrichment analysis based on mutant phenotypes for each module. The graph of the modular structures is presented as Figure S4.

| Module ID | Number of genes | Number of phenotyped genes | Associated tissue type (\$ value)                                                                                                                                                 |
|-----------|-----------------|----------------------------|-----------------------------------------------------------------------------------------------------------------------------------------------------------------------------------|
| 1         | 1893            | 307                        | testis ( $<10^{-29}$ ); oocyte ( $<10^{-5}$ )                                                                                                                                     |
| 2         | 1456            | 296                        | placenta ( $<10^{-11}$ ); testis ( $<10^{-4}$ ); oocyte ( $<10^{-3}$ )                                                                                                            |
| 3         | 1171            | 276                        | hippocampus ( $<10^{-11}$ ); cerebral cortex ( $<10^{-10}$ ); frontal cortex ( $<10^{-6}$ ); cerebellum ( $<10^{-6}$ ); spinal cord ( $<10^{-3}$ ); olfactory bulb ( $<10^{-3}$ ) |
| 4         | 942             | 299                        | spleen ( $<10^{-6}$ ); liver ( $<10^{-4}$ ); bone marrow ( $<10^{-4}$ ); thymus ( $<10^{-3}$ )                                                                                    |
| 5         | 641             | 169                        | thyroid ( $<10^{-3}$ ); thymus ( $<10^{-3}$ ); lymph node ( $<10^{-3}$ ); bone marrow ( $<10^{-3}$ )                                                                              |
| 6         | 607             | 191                        | liver ( $<10^{-20}$ )                                                                                                                                                             |
| 7         | 471             | 197                        | bone ( $<10^{-8}$ ); digits ( $<10^{-5}$ ); lung ( $<10^{-3}$ ); trachea ( $<10^{-3}$ )                                                                                           |
| 8         | 444             | 141                        | skeletal muscle ( $<10^{-24}$ ); heart ( $<10^{-3}$ )                                                                                                                             |
| 9         | 355             | 54                         |                                                                                                                                                                                   |
| 10        | 331             | 113                        | spleen ( $<10^{-11}$ ); lymph node ( $<10^{-6}$ )                                                                                                                                 |
| 11        | 323             | 93                         | kidney ( $<10^{-14}$ )                                                                                                                                                            |
| 12        | 320             | 105                        | spleen ( $<10^{-3}$ ); bone marrow ( $<10^{-3}$ )                                                                                                                                 |
| 13        | 299             | 43                         |                                                                                                                                                                                   |
| 14        | 257             | 83                         | large intestine ( $<10^{-7}$ )                                                                                                                                                    |
| 15        | 233             | 75                         | placenta ( $<10^{-9}$ )                                                                                                                                                           |
| 16        | 223             | 63                         | small intestine ( $<10^{-3}$ )                                                                                                                                                    |
| 17        | 223             | 52                         | prostate ( $<10^{-3}$ )                                                                                                                                                           |
| 18        | 213             | 62                         | eye ( $<10^{-4}$ )                                                                                                                                                                |
| 19        | 210             | 56                         |                                                                                                                                                                                   |
| 20        | 199             | 48                         | spinal cord ( $<10^{-4}$ ); dorsal root ganglia ( $<10^{-3}$ ); trigeminal ( $<10^{-3}$ )                                                                                         |
| 21        | 197             | 73                         | bone marrow ( $<10^{-11}$ ); spleen ( $<10^{-6}$ ); epidermis ( $<10^{-4}$ )                                                                                                      |
| 22        | 196             | 77                         |                                                                                                                                                                                   |
| 23        | 191             | 90                         | heart ( $<10^{-6}$ ); lung ( $<10^{-6}$ )                                                                                                                                         |
| 24        | 189             | 51                         | cerebellum ( $<10^{-6}$ ); hippocampus ( $<10^{-3}$ ); spinal cord ( $<10^{-3}$ )                                                                                                 |
| 25        | 188             | 57                         | bone marrow ( $<10^{-3}$ )                                                                                                                                                        |
| 26        | 185             | 45                         | epidermis ( $<10^{-7}$ ); tongue ( $<10^{-3}$ )                                                                                                                                   |
| 27        | 184             | 63                         | lymph node ( $<10^{-4}$ )                                                                                                                                                         |
| 28        | 182             | 70                         | bone marrow ( $<10^{-5}$ ); bone ( $<10^{-5}$ ); spleen ( $<10^{-5}$ )                                                                                                            |
| 29        | 178             | 66                         | eye ( $<10^{-21}$ )                                                                                                                                                               |
| 30        | 170             | 50                         | brown fat ( $<10^{-10}$ ); adipose tissue ( $<10^{-9}$ ); liver ( $<10^{-6}$ )                                                                                                    |
| 31        | 156             | 39                         | pancreas ( $<10^{-7}$ )                                                                                                                                                           |
| 32        | 138             | 39                         | cerebellum ( $<10^{-7}$ )                                                                                                                                                         |
| 33        | 130             | 40                         |                                                                                                                                                                                   |
| 34        | 125             | 47                         | pancreas ( $<10^{-11}$ )                                                                                                                                                          |
| 35        | 114             | 29                         |                                                                                                                                                                                   |
| 36        | 112             | 35                         |                                                                                                                                                                                   |
| 37        | 111             | 32                         |                                                                                                                                                                                   |
| 38        | 109             | 38                         | thymus ( $<10^{-12}$ ); thyroid ( $<10^{-11}$ ); lymph node ( $<10^{-7}$ ); spleen ( $<10^{-5}$ )                                                                                 |
| 39        | 107             | 52                         | heart ( $<10^{-17}$ )                                                                                                                                                             |
| 40        | 102             | 23                         |                                                                                                                                                                                   |
| 41        | 98              | 25                         |                                                                                                                                                                                   |
| 42        | 97              | 29                         | stomach ( $<10^{-15}$ )                                                                                                                                                           |
| 43        | 93              | 33                         | eye ( $<10^{-3}$ )                                                                                                                                                                |
| 44        | 92              | 19                         |                                                                                                                                                                                   |
| 45        | 92              | 34                         | bladder ( $<10^{-3}$ )                                                                                                                                                            |
| 46        | 88              | 26                         |                                                                                                                                                                                   |
| 47        | 83              | 19                         |                                                                                                                                                                                   |
| 48        | 83              | 39                         | spleen ( $<10^{-3}$ )                                                                                                                                                             |
| 49        | 74              | 17                         | hypothalamus ( $<10^{-6}$ )                                                                                                                                                       |
| 50        | 69              | 23                         |                                                                                                                                                                                   |
| 51        | 67              | 29                         | pituitary ( $<10^{-9}$ ); adrenal gland ( $<10^{-3}$ )                                                                                                                            |
| 52        | 65              | 33                         | hypothalamus ( $<10^{-3}$ ); eye ( $<10^{-3}$ )                                                                                                                                   |

|    |    |    |                                                                          |
|----|----|----|--------------------------------------------------------------------------|
| 53 | 65 | 27 | adrenal gland ( $<10^{-3}$ )                                             |
| 54 | 61 | 14 |                                                                          |
| 55 | 61 | 19 | thymus ( $<10^{-5}$ ); thyroid ( $<10^{-5}$ ); lymph node ( $<10^{-3}$ ) |
| 56 | 61 | 26 | ovary ( $<10^{-12}$ ); oocyte ( $<10^{-6}$ ); uterus ( $<10^{-4}$ )      |
| 57 | 55 | 14 |                                                                          |
| 58 | 53 | 20 |                                                                          |
| 59 | 53 | 22 |                                                                          |
| 60 | 47 | 21 |                                                                          |
| 61 | 45 | 22 |                                                                          |
| 62 | 39 | 15 |                                                                          |
| 63 | 37 | 18 | mammary gland ( $<10^{-10}$ )                                            |
| 64 | 30 | 9  |                                                                          |

---

**Table S7.** Genes modules in the RNA-seq-based coexpression network and the associated tissue identified by enrichment analysis based on mutant phenotypes for each module. The graph of the modular structures is presented as Figure S5.

| Module ID | Number of genes | Number of phenotyped genes | Associated tissue type (! value)!                                                                                                                                                                 |
|-----------|-----------------|----------------------------|---------------------------------------------------------------------------------------------------------------------------------------------------------------------------------------------------|
| 1         | 9983            | 2695                       | Uncalculated because gene number > 5,000                                                                                                                                                          |
| 2         | 838             | 245                        | cerebellum (<10 <sup>-3</sup> )                                                                                                                                                                   |
| 3         | 737             | 226                        |                                                                                                                                                                                                   |
| 4         | 570             | 205                        | spleen (<10 <sup>-26</sup> ); lymph node (<10 <sup>-25</sup> ); large intestine (<10 <sup>-7</sup> ); thymus (<10 <sup>-5</sup> ); thyroid (<10 <sup>-4</sup> ); bone marrow (<10 <sup>-4</sup> ) |
| 5         | 478             | 102                        |                                                                                                                                                                                                   |
| 6         | 449             | 120                        | spleen (<10 <sup>-4</sup> ); lymph node (<10 <sup>-4</sup> ); thymus (<10 <sup>-4</sup> ); thyroid (<10 <sup>-3</sup> )                                                                           |
| 7         | 416             | 92                         |                                                                                                                                                                                                   |
| 8         | 306             | 122                        | eye (<10 <sup>-27</sup> )                                                                                                                                                                         |
| 9         | 292             | 110                        | skeletal muscle (<10 <sup>-5</sup> )                                                                                                                                                              |
| 10        | 248             | 72                         | cerebral cortex (<10 <sup>-4</sup> ); olfactory bulb (<10 <sup>-3</sup> ); hippocampus (<10 <sup>-3</sup> )                                                                                       |
| 11        | 241             | 56                         |                                                                                                                                                                                                   |
| 12        | 227             | 71                         |                                                                                                                                                                                                   |
| 13        | 170             | 54                         | hypothalamus (<10 <sup>-3</sup> )                                                                                                                                                                 |
| 14        | 136             | 44                         |                                                                                                                                                                                                   |
| 15        | 133             | 8                          |                                                                                                                                                                                                   |
| 16        | 127             | 34                         | olfactory bulb (<10 <sup>-3</sup> )                                                                                                                                                               |
| 17        | 123             | 7                          |                                                                                                                                                                                                   |
| 18        | 94              | 31                         |                                                                                                                                                                                                   |
| 19        | 87              | 21                         |                                                                                                                                                                                                   |
| 20        | 66              | 14                         | bladder (<10 <sup>-3</sup> ); prostate (<10 <sup>-3</sup> )                                                                                                                                       |
| 21        | 41              | 15                         |                                                                                                                                                                                                   |
| 22        | 34              | 17                         |                                                                                                                                                                                                   |



**Table S8.** The module IDs that were associated with any of the 47 mouse tissues for each of the GNF1M-, MOE430- or RNA-seq-based network.

| #  | Tissue                    | Associated modules IDs in the network |                           |         |
|----|---------------------------|---------------------------------------|---------------------------|---------|
|    |                           | GNF1M                                 | MOE430                    | RNA-seq |
| 1  | Adipose tissue            | 35                                    | 30                        |         |
| 2  | Adrenal gland             | 39, 51                                | 51, 53                    |         |
| 3  | Amygdala                  |                                       |                           |         |
| 4  | Bladder                   |                                       | 45                        | 20      |
| 5  | Bone                      | 9, 11, 13, 38, 41                     | 7, 28                     |         |
| 6  | Bone marrow               | 7, 13, 15, 38, 41                     | 4, 5, 12, 21, 25, 28      | 4       |
| 7  | Brown fat                 | 35, 47                                | 30                        |         |
| 8  | Cerebellum                | 4, 18, 32                             | 3, 24, 32                 | 2       |
| 9  | Cerebral cortex           | 4                                     | 3                         | 10      |
| 10 | Digits                    |                                       | 7                         |         |
| 11 | Dorsal root ganglia       |                                       | 20                        |         |
| 12 | Dorsal striatum           |                                       |                           |         |
| 13 | Epidermis                 | 16                                    | 21, 26                    |         |
| 14 | Eye                       | 25                                    | 18, 29, 43, 52            | 8       |
| 15 | Frontal cortex            | 4                                     | 3                         |         |
| 16 | Heart                     | 24, 27                                | 8, 23, 39                 |         |
| 17 | Hippocampus               | 4                                     | 3, 24                     | 10      |
| 18 | Hypothalamus              | 14                                    | 49, 52                    | 13      |
| 19 | Kidney                    | 12                                    | 11                        |         |
| 20 | Large intestine           | 28, 38                                | 14                        | 4       |
| 21 | Liver                     | 10, 35                                | 4, 6, 30                  |         |
| 22 | Lung                      | 27, 37                                | 7, 23                     |         |
| 23 | Lymph node                | 7, 13, 22                             | 5, 10, 27, 38, 55         | 4, 6    |
| 24 | Mammary gland             | 44                                    | 63                        |         |
| 25 | Medial olfactory epithel. | 19                                    |                           |         |
| 26 | Olfactory bulb            | 19                                    | 3                         | 10, 16  |
| 27 | Oocyte                    | 3                                     | 1, 2, 56                  |         |
| 28 | Ovary                     | 2                                     | 56                        |         |
| 29 | Pancreas                  | 35                                    | 31, 34                    |         |
| 30 | Pituitary                 | 51                                    | 51                        |         |
| 31 | Placenta                  | 5,31,52                               | 2, 15                     |         |
| 32 | Prostate                  | 34                                    | 17                        | 20      |
| 33 | Salivary gland            |                                       |                           |         |
| 34 | Skeletal muscle           | 11, 21                                | 8                         | 9       |
| 35 | Small intestine           | 20                                    | 16                        |         |
| 36 | Spinal cord               | 4, 17, 18                             | 3, 20, 24                 |         |
| 37 | Spleen                    | 6, 7, 15, 22, 38, 41                  | 4, 10, 12, 21, 28, 38, 48 | 4, 6    |
| 38 | Stomach                   | 42                                    | 42                        |         |
| 39 | Substantia nigra          |                                       |                           |         |
| 40 | Testis                    | 3, 5                                  | 1, 2                      |         |
| 41 | Thymus                    | 7, 26                                 | 4, 5,38, 55               | 4, 6    |
| 42 | Thyroid                   | 7, 26                                 | 5, 38, 55                 | 4, 6    |
| 43 | Tongue                    | 16, 40                                | 26                        |         |
| 44 | Trachea                   |                                       | 7                         |         |
| 45 | Trigeminal                |                                       | 20                        |         |
| 46 | Uterus                    | 51                                    | 56                        |         |
| 47 | Vomeronasal organ         | 50                                    |                           |         |

**Table S9.**  $R_{dcv/phe}$  for each set of genes with a given confidence score and a given predicted tissue function.

| Predicted tissue function   | Confidence score of genes |                  |                  | Others            |
|-----------------------------|---------------------------|------------------|------------------|-------------------|
|                             | High                      | Medium           | Low              |                   |
| Adipose tissue              | -                         | 58.82% (10/17)   | 43.1% (25/58)    | 11.46% (491/4284) |
| Adrenal gland               | -                         | 26.47% (9/34)    | 10% (4/40)       | 1.82% (78/4285)   |
| Amygdala                    | -                         | -                | -                | 0.18% (8/4359)    |
| Bladder                     | -                         | 100% (1/1)       | 10.87% (5/46)    | 0.95% (41/4312)   |
| Bone                        | 57.45% (27/47)            | 53.57% (195/364) | 40.46% (384/949) | 28.71% (861/2999) |
| Bone marrow                 | 31.11% (14/45)            | 31.39% (70/223)  | 18.85% (148/785) | 6.9% (228/3306)   |
| Brown fat                   | -                         | 33.33% (8/24)    | 18.64% (11/59)   | 1.78% (76/4276)   |
| Cerebellum                  | 26.67% (8/30)             | 21.26% (44/207)  | 8.81% (37/420)   | 4.24% (157/3702)  |
| Cerebral cortex             | 50% (2/4)                 | 16.28% (21/129)  | 10.54% (31/294)  | 3.64% (143/3932)  |
| Digits                      | -                         | -                | 11.17% (22/197)  | 3.92% (163/4162)  |
| Dorsal root ganglia         | -                         | -                | 12.5% (6/48)     | 1.51% (65/4311)   |
| Dorsal striatum             | -                         | -                | -                | 0.14% (6/4359)    |
| Epidermis                   | -                         | 71.43% (15/21)   | 33.81% (47/139)  | 13.05% (548/4199) |
| Eye                         | 96.30% (52/54)            | 77.27% (34/44)   | 34.39% (65/189)  | 19.25% (784/4072) |
| Frontal cortex              | -                         | 3.2% (4/125)     | 2.07% (5/242)    | 0.1% (4/3992)     |
| Heart                       | -                         | 51.22% (42/82)   | 39.69% (102/257) | 16.99% (683/4020) |
| Hippocampus                 | 75% (3/4)                 | 19.72% (28/142)  | 12.54% (40/319)  | 3.65% (142/3894)  |
| Hypothalamus                | 100% (1/1)                | 40% (4/10)       | 6.29% (9/143)    | 0.67% (28/4205)   |
| Kidney                      | -                         | 56.25% (27/48)   | 36.99% (27/73)   | 13.1% (555/4238)  |
| Large intestine             | 0% (0/1)                  | 31.91% (15/47)   | 12.89% (37/287)  | 3.16% (127/4024)  |
| Liver                       | -                         | 57.36% (74/129)  | 30.39% (134/441) | 15.54% (589/3789) |
| Lung                        | -                         | 40.98% (25/61)   | 23.78% (73/307)  | 11.48% (458/3991) |
| Lymph node                  | 50.88% (29/57)            | 23.08% (36/156)  | 10.6% (58/547)   | 2.64% (95/3599)   |
| Mammary gland               | -                         | 69.23% (9/13)    | 17.65% (3/17)    | 2.84% (123/4329)  |
| Medial olfactory epithelium | -                         | -                | 11.76% (6/51)    | 0.65% (28/4308)   |
| Olfactory bulb              | 100% (1/1)                | 23.08% (3/13)    | 6.68% (27/404)   | 1.55% (61/3941)   |
| Oocyte                      | -                         | 9.09% (14/154)   | 5.29% (28/529)   | 0.9% (33/3676)    |
| Ovary                       | -                         | 90% (9/10)       | 8.19% (29/354)   | 4.63% (185/3995)  |
| Pancreas                    | -                         | -                | 34.38% (44/128)  | 5.51% (233/4231)  |
| Pituitary                   | -                         | 57.14% (8/14)    | 10% (2/20)       | 1.92% (83/4325)   |
| Placenta                    | -                         | 28.57% (40/140)  | 15.46% (47/304)  | 5.72% (224/3915)  |
| Prostate                    | -                         | 20% (1/5)        | 11.49% (10/87)   | 1.12% (48/4267)   |
| Salivary gland              | -                         | -                | -                | 1.65% (72/4359)   |
| Skeletal muscle             | 78.57% (11/14)            | 48.28% (28/58)   | 14.23% (34/239)  | 5.16% (209/4048)  |
| Small intestine             | -                         | 20% (6/30)       | 6.67% (4/60)     | 2.25% (96/4269)   |
| Spinal cord                 | -                         | 14.43% (29/201)  | 10.56% (32/303)  | 3.99% (154/3855)  |
| Spleen                      | 60.87% (56/92)            | 37.32% (128/343) | 22.69% (152/670) | 9.25% (301/3254)  |
| Stomach                     | -                         | 58.82% (10/17)   | 33.33% (8/24)    | 2.62% (113/4318)  |
| Substantia nigra            | -                         | -                | -                | 0.21% (9/4359)    |
| Testis                      | -                         | 32.58% (86/264)  | 18.61% (83/446)  | 7.23% (264/3649)  |
| Thymus                      | 60% (24/40)               | 27.83% (32/115)  | 11.34% (81/714)  | 5.76% (201/3490)  |
| Thyroid                     | 58.06% (18/31)            | 38.16% (29/76)   | 12.09% (63/521)  | 6.33% (236/3731)  |
| Tongue                      | -                         | 10% (2/20)       | 11.58% (11/95)   | 1.23% (52/4244)   |
| Trachea                     | -                         | -                | 4.57% (9/197)    | 0.94% (39/4162)   |
| Trigeminal                  | -                         | -                | 10.42% (5/48)    | 1.25% (54/4311)   |
| Uterus                      | -                         | -                | 26.67% (12/45)   | 2.74% (118/4314)  |
| Vomeronasal organ           | -                         | -                | -                | 0.21% (9/4359)    |

**Table S10.** Enrichment of human orthologs of mouse genes with the top ranked  $Z_{eye}$  in genes cataloged in RetNet (dubbed “RetNet”) or HPO-defined eye disease genes (dubbed “HPO”).

| Confidence score of predicted eye functions (sample size) | <i>P</i> -value <sup>1</sup> |                   |                                                                 |       |
|-----------------------------------------------------------|------------------------------|-------------------|-----------------------------------------------------------------|-------|
|                                                           | All orthologs                |                   | Orthologs without any previously reported eye phenotype in mice |       |
|                                                           | RetNet                       | HPO               | RetNet                                                          | HPO   |
| High (42)                                                 | 0.053                        | 0.034             | 0.297                                                           | 0.323 |
| High+Medium (177)                                         | 0.016                        | <10 <sup>-3</sup> | 0.747                                                           | 0.844 |
| High+Medium+Low (821)                                     | 0.160                        | <10 <sup>-3</sup> | 0.111                                                           | ns    |

<sup>1</sup> *P*-value was obtained under the null hypothesis of no enrichment by Fisher’s exact test (ns: not significant)

**Table S11.** Mouse genes whose predicted eye functions were supported by all the three datasets (i.e., with a high confidence score).

| MGI ID      | Gene symbol | Gene name                                                                                | Mutant Strain Availability | Eye abnormality | Tissues affected by the mutations <sup>1</sup> |
|-------------|-------------|------------------------------------------------------------------------------------------|----------------------------|-----------------|------------------------------------------------|
| MGI:109424  | Abca4       | ATP-binding cassette, sub-family A (ABC1), member 4                                      | Yes                        | Yes             | epidermis, eye                                 |
| MGI:2148800 | Aipl1       | aryl hydrocarbon receptor-interacting protein-like 1                                     | Yes                        | Yes             | eye                                            |
| MGI:2443398 | Ankrd33     | ankyrin repeat domain 33                                                                 | No                         | -               | -                                              |
| MGI:2159617 | Arr3        | arrestin 3, retinal                                                                      | Yes                        | -               | -                                              |
| MGI:2385061 | BC027072    | cDNA sequence BC027072                                                                   | Yes                        | Yes             | eye                                            |
| MGI:1920910 | Cabp4       | calcium binding protein 4                                                                | Yes                        | Yes             | eye                                            |
| MGI:1352746 | Cabp5       | calcium binding protein 5                                                                | Yes                        | Yes             | eye                                            |
| MGI:2442632 | Cacna2d4    | calcium channel, voltage-dependent, alpha 2/delta subunit 4                              | Yes                        | Yes             | eye                                            |
| MGI:88436   | Cnga1       | cyclic nucleotide gated channel alpha 1                                                  | No                         | -               | -                                              |
| MGI:2384571 | Cplx3       | complexin 3                                                                              | Yes                        | Yes             | eye                                            |
| MGI:2685803 | Cplx4       | complexin 4                                                                              | Yes                        | Yes             | eye                                            |
| MGI:1194883 | Crx         | cone-rod homeobox containing gene                                                        | Yes                        | Yes             | eye                                            |
| MGI:88515   | Cryaa       | crystallin, alpha A                                                                      | Yes                        | Yes             | eye                                            |
| MGI:88518   | Cryba1      | crystallin, beta A1                                                                      | Yes                        | Yes             | eye                                            |
| MGI:102716  | Cryba4      | crystallin, beta A4                                                                      | No                         | -               | -                                              |
| MGI:88519   | Crybb2      | crystallin, beta B2                                                                      | Yes                        | Yes             | cerebellum, eye                                |
| MGI:102717  | Crybb3      | crystallin, beta B3                                                                      | No                         | -               | -                                              |
| MGI:88521   | Cryga       | crystallin, gamma A                                                                      | Yes                        | Yes             | eye                                            |
| MGI:88522   | Crygb       | crystallin, gamma B                                                                      | Yes                        | Yes             | eye                                            |
| MGI:88524   | Crygd       | crystallin, gamma D                                                                      | Yes                        | Yes             | eye                                            |
| MGI:88526   | Crygf       | crystallin, gamma F                                                                      | Yes                        | Yes             | eye                                            |
| MGI:1298216 | Crygs       | crystallin, gamma S                                                                      | Yes                        | Yes             | eye                                            |
| MGI:102563  | Dct         | dopachrome tautomerase                                                                   | Yes                        | Yes             | eye                                            |
| MGI:95625   | Gabbr1      | gamma-aminobutyric acid (GABA) C receptor, subunit rho 1                                 | Yes                        | Yes             | eye                                            |
| MGI:95626   | Gabbr2      | gamma-aminobutyric acid (GABA) C receptor, subunit rho 2                                 | Yes                        | No              | heart, testis                                  |
| MGI:3648918 | Gm4792      | predicted gene 4792                                                                      | Yes                        | -               | -                                              |
| MGI:3646315 | Gm9918      | predicted gene 9918                                                                      | No                         | -               | -                                              |
| MGI:95778   | Gnat1       | guanine nucleotide binding protein, alpha transducing 1                                  | Yes                        | Yes             | eye                                            |
| MGI:95779   | Gnat2       | guanine nucleotide binding protein, alpha transducing 2                                  | Yes                        | Yes             | eye                                            |
| MGI:109165  | Gngt1       | guanine nucleotide binding protein (G protein), gamma transducing activity polypeptide 1 | Yes                        | Yes             | eye                                            |
| MGI:1925248 | Grifin      | galectin-related inter-fiber protein                                                     | No                         | -               | -                                              |
| MGI:1345146 | Grk1        | G protein-coupled receptor kinase 1                                                      | Yes                        | Yes             | eye                                            |
| MGI:102770  | Guca1a      | guanylate cyclase activator 1a (retina)                                                  | Yes                        | Yes             | eye                                            |
| MGI:1194489 | Guca1b      | guanylate cyclase activator 1B                                                           | Yes                        | Yes             | eye                                            |
| MGI:2384820 | Kcnj14      | potassium inwardly-rectifying channel, subfamily J, member 14                            | Yes                        | No              | -                                              |
| MGI:2670981 | Kcnv2       | potassium channel, subfamily V, member 2                                                 | Yes                        | No              | -                                              |
| MGI:2385320 | Lrit1       | leucine-rich repeat, immunoglobulin-like and transmembrane domains 1                     | No                         | -               | -                                              |
| MGI:2444885 | Lrit2       | leucine-rich repeat, immunoglobulin-like and transmembrane domains 2                     | No                         | -               | -                                              |
| MGI:96990   | Mip         | major intrinsic protein of eye lens fiber                                                | Yes                        | Yes             | eye                                            |
| MGI:108454  | Mlana       | melan-A                                                                                  | Yes                        | No              | -                                              |

|             |         |                                                                          |     |     |                                                                                                                                           |
|-------------|---------|--------------------------------------------------------------------------|-----|-----|-------------------------------------------------------------------------------------------------------------------------------------------|
| MGI:2386681 | Mpp4    | membrane protein, palmitoylated 4 (MAGUK p55 subfamily member 4)         | Yes | Yes | eye                                                                                                                                       |
| MGI:108055  | Neurod4 | neurogenic differentiation 4                                             | Yes | No  | cerebellum                                                                                                                                |
| MGI:1346317 | Nr2e3   | nuclear receptor subfamily 2, group E, member 3                          | Yes | Yes | eye                                                                                                                                       |
| MGI:97454   | Oca2    | oculocutaneous albinism II                                               | Yes | Yes | adipose tissue, epidermis, eye, kidney, liver, spleen, testis                                                                             |
| MGI:1097692 | Opn1mw  | opsin 1 (cone pigments), medium-wave-sensitive (color blindness, deutan) | Yes | Yes | eye                                                                                                                                       |
| MGI:97451   | Otx2    | orthodenticle homolog 2 (Drosophila)                                     | Yes | Yes | bone, eye, heart, medial olfactory epithelium, olfactory bulb, pituitary, skeletal muscle, testis, tongue, trigeminal, vomeralnasal organ |
| MGI:98090   | Pdc     | phosducin                                                                | Yes | Yes | eye, heart                                                                                                                                |
| MGI:97524   | Pde6a   | phosphodiesterase 6A, cGMP-specific, rod, alpha                          | Yes | Yes | eye                                                                                                                                       |
| MGI:97525   | Pde6b   | phosphodiesterase 6B, cGMP, rod receptor, beta polypeptide               | Yes | Yes | eye                                                                                                                                       |
| MGI:105956  | Pde6c   | phosphodiesterase 6C, cGMP specific, cone, alpha prime                   | Yes | Yes | eye                                                                                                                                       |
| MGI:97526   | Pde6g   | phosphodiesterase 6G, cGMP-specific, rod, gamma                          | Yes | Yes | eye                                                                                                                                       |
| MGI:1925850 | Pde6h   | phosphodiesterase 6H, cGMP-specific, cone, gamma                         | Yes | No  | -                                                                                                                                         |
| MGI:1342304 | Ppef2   | protein phosphatase, EF hand calcium-binding domain 2                    | Yes | No  | -                                                                                                                                         |
| MGI:2142330 | Ppm1n   | protein phosphatase, Mg2+/Mn2+ dependent, 1N (putative)                  | No  | -   | -                                                                                                                                         |
| MGI:102791  | Prph2   | peripherin 2                                                             | Yes | Yes | eye                                                                                                                                       |
| MGI:109632  | Rax     | retina and anterior neural fold homeobox                                 | Yes | Yes | eye, hypothalamus                                                                                                                         |
| MGI:97878   | Rbp3    | retinol binding protein 3, interstitial                                  | Yes | Yes | eye                                                                                                                                       |
| MGI:97883   | Rcvrn   | recoverin                                                                | Yes | Yes | eye                                                                                                                                       |
| MGI:1925224 | Rdh12   | retinol dehydrogenase 12                                                 | Yes | Yes | eye                                                                                                                                       |
| MGI:1929473 | Rgr     | retinal G protein coupled receptor                                       | Yes | Yes | eye                                                                                                                                       |
| MGI:97998   | Rom1    | rod outer segment membrane protein 1                                     | Yes | Yes | eye                                                                                                                                       |
| MGI:2384303 | Rp111   | retinitis pigmentosa 1 homolog (human)-like 1                            | Yes | Yes | eye                                                                                                                                       |
| MGI:98001   | Rpe65   | retinal pigment epithelium 65                                            | Yes | Yes | eye                                                                                                                                       |
| MGI:1336189 | Rs1     | retinoschisis (X-linked, juvenile) 1 (human)                             | Yes | Yes | eye                                                                                                                                       |
| MGI:2443686 | Rtbdn   | retbindin                                                                | Yes | Yes | eye                                                                                                                                       |
| MGI:98227   | Sag     | retinal S-antigen                                                        | Yes | Yes | eye                                                                                                                                       |
| MGI:1923203 | Samd7   | sterile alpha motif domain containing 7                                  | No  | -   | -                                                                                                                                         |
| MGI:2444087 | Slc1a7  | solute carrier family 1 (glutamate transporter), member 7                | Yes | No  | -                                                                                                                                         |
| MGI:2384871 | Slc24a1 | solute carrier family 24 (sodium/potassium/calcium exchanger), member 1  | Yes | Yes | eye                                                                                                                                       |
| MGI:103077  | Stx3    | syntaxin 3                                                               | Yes | No  | -                                                                                                                                         |
| MGI:2444167 | Tmem215 | transmembrane protein 215                                                | No  | -   | -                                                                                                                                         |
| MGI:1330305 | Trpm1   | transient receptor potential cation channel, subfamily M, member 1       | Yes | Yes | eye                                                                                                                                       |

|             |         |                          |     |     |     |
|-------------|---------|--------------------------|-----|-----|-----|
| MGI:2384781 | Tspan10 | tetraspanin 10           | No  | -   | -   |
| MGI:109571  | Tulp1   | tubby like protein 1     | Yes | Yes | eye |
| MGI:88401   | Vsx2    | visual system homeobox 2 | Yes | Yes | eye |

<sup>1</sup> Affected tissues among the 47 tissues that were considered

**Table S12.** Mouse genes whose predicted eye functions were supported by two of the three datasets (i.e., with a medium confidence score)

| MGI ID      | Gene symbol   | Gene name                                                                                      | Mutant Strain Availability | Eye abnormality | Tissues affected by mutations <sup>1</sup> |
|-------------|---------------|------------------------------------------------------------------------------------------------|----------------------------|-----------------|--------------------------------------------|
| MGI:1921284 | 4632404H12Rik | RIKEN cDNA 4632404H12 gene                                                                     | No                         | -               | -                                          |
| MGI:1923144 | Adal          | adenosine deaminase-like                                                                       | Yes                        | No              | -                                          |
| MGI:2442600 | Adamts18      | a disintegrin-like and metallopeptidase (reprolysin type) with thrombospondin type 1 motif, 18 | Yes                        | Yes             | eye, lung, large intestine                 |
| MGI:1927136 | Arl6          | ADP-ribosylation factor-like 6                                                                 | Yes                        | Yes             | adipose tissue, bone, eye, hippocampus     |
| MGI:2387588 | Best2         | bestrophin 2                                                                                   | Yes                        | Yes             | eye                                        |
| MGI:101770  | Bfsp1         | beaded filament structural protein 1, in lens-CP94                                             | Yes                        | Yes             | eye                                        |
| MGI:1859639 | Cacna1f       | calcium channel, voltage-dependent, alpha 1F subunit                                           | Yes                        | Yes             | eye                                        |
| MGI:1344341 | Car14         | carbonic anhydrase 14                                                                          | Yes                        | -               | -                                          |
| MGI:1924487 | Cc2d2a        | coiled-coil and C2 domain containing 2A                                                        | Yes                        | Yes             | digits, eye, heart, kidney                 |
| MGI:1889376 | Ccdc126       | coiled-coil domain containing 126                                                              | No                         | -               | -                                          |
| MGI:2136343 | Crb1          | crumbs homolog 1 (Drosophila)                                                                  | Yes                        | Yes             | eye                                        |
| MGI:2451355 | Crxos         | Crx opposite strand transcript 1                                                               | No                         | -               | -                                          |
| MGI:88516   | Cryab         | crystallin, alpha B                                                                            | Yes                        | Yes             | eye, skeletal muscle                       |
| MGI:104336  | Cryba2        | crystallin, beta A2                                                                            | Yes                        | Yes             | eye                                        |
| MGI:104992  | Crybb1        | crystallin, beta B1                                                                            | No                         | -               | -                                          |
| MGI:2449167 | Crygn         | crystallin, gamma N                                                                            | Yes                        | -               | -                                          |
| MGI:2179198 | Defb9         | defensin beta 9                                                                                | No                         | -               | -                                          |
| MGI:2141813 | Dhx32         | DEAH (Asp-Glu-Ala-His) box polypeptide 32                                                      | No                         | -               | -                                          |
| MGI:1354952 | Dkk3          | dickkopf homolog 3 (Xenopus laevis)                                                            | Yes                        | -               | -                                          |
| MGI:94926   | Drd4          | dopamine receptor D4                                                                           | Yes                        | Yes             | eye                                        |
| MGI:95285   | Edn3          | endothelin 3                                                                                   | Yes                        | -               | large intestine                            |
| MGI:103009  | Epb4 112      | erythrocyte protein band 4 1-like 2                                                            | Yes                        | -               | testis                                     |
| MGI:1922747 | Fabp12        | fatty acid binding protein 12                                                                  | Yes                        | -               | -                                          |
| MGI:2444268 | Fam169a       | family with sequence similarity 169, member A                                                  | No                         | -               | -                                          |
| MGI:3046463 | Fam19a3       | family with sequence similarity 19, member A3                                                  | Yes                        | -               | -                                          |
| MGI:2685472 | Frmpd2        | FERM and PDZ domain containing 2                                                               | No                         | -               | -                                          |
| MGI:2443337 | Fscn2         | fascin homolog 2, actin-bundling protein, retinal (Strongylocentrotus purpuratus)              | Yes                        | Yes             | eye                                        |
| MGI:99953   | Gja8          | gap junction protein, alpha 8                                                                  | Yes                        | Yes             | eye                                        |
| MGI:1923993 | Gje1          | gap junction protein, epsilon 1                                                                | Yes                        | Yes             | eye                                        |
| MGI:95785   | Gnb3          | guanine nucleotide binding protein (G protein), beta 3                                         | Yes                        | Yes             | eye                                        |
| MGI:2685519 | Gpr152        | G protein-coupled receptor 152                                                                 | Yes                        | No              | bone                                       |
| MGI:99549   | Gzmm          | granzyme M (lymphocyte met-ase 1)                                                              | Yes                        | -               | -                                          |
| MGI:1926876 | Impg1         | interphotoreceptor matrix proteoglycan 1                                                       | No                         | -               | -                                          |
| MGI:1927642 | Irx6          | Iroquois related homeobox 6 (Drosophila)                                                       | Yes                        | Yes             | eye                                        |
| MGI:101776  | Lhx4          | LIM homeobox protein 4                                                                         | Yes                        | -               | lung, pituitary                            |
| MGI:1891259 | Lrat          | lecithin-retinol acyltransferase (phosphatidylcholine-retinol-O-acyltransferase)               | Yes                        | Yes             | eye, testis                                |

|             |         |                                                                         |     |     |                                      |
|-------------|---------|-------------------------------------------------------------------------|-----|-----|--------------------------------------|
| MGI:2685622 | Lyg2    | lysozyme G-like 2                                                       | No  | -   | -                                    |
| MGI:1333773 | Mab2111 | mab-21-like 1 (C. elegans)                                              | Yes | Yes | eye                                  |
| MGI:96913   | Mak     | male germ cell-associated kinase                                        | Yes | -   | -                                    |
| MGI:2150656 | Man2a2  | mannosidase 2, alpha 2                                                  | Yes | -   | testis                               |
| MGI:1914999 | Mgarp   | mitochondria localized glutamic acid rich protein                       | No  | -   | -                                    |
| MGI:98481   | Nhlh1   | nescient helix loop helix 1                                             | Yes | No  | heart                                |
| MGI:102567  | Nrl     | neural retina leucine zipper gene                                       | Yes | Yes | eye                                  |
| MGI:1924446 | Nxn1    | nucleoredoxin-like 1                                                    | Yes | Yes | eye                                  |
| MGI:1922374 | Nxn2    | nucleoredoxin-like 2                                                    | Yes | Yes | eye, medial olfactory epithelium     |
| MGI:2448607 | Nyx     | nyctalopin                                                              | Yes | Yes | eye                                  |
| MGI:99438   | Opn1sw  | opsin 1 (cone pigments), short-wave-sensitive (color blindness, tritan) | Yes | Yes | eye                                  |
| MGI:1888678 | Otor    | otoraplin                                                               | No  | -   | -                                    |
| MGI:1916489 | Pdzph1  | PDZ and pleckstrin homology domains 1                                   | No  | -   | -                                    |
| MGI:101899  | Pla2g5  | phospholipase A2, group V                                               | Yes | -   | heart                                |
| MGI:3026984 | Plk5    | polo-like kinase 5 (Drosophila)                                         | Yes | No  | -                                    |
| MGI:98301   | Pmel    | premelanosome protein                                                   | Yes | Yes | eye                                  |
| MGI:1354947 | Polg2   | polymerase (DNA directed), gamma 2, accessory subunit                   | Yes | Yes | eye                                  |
| MGI:2443631 | Pou6f2  | POU domain, class 6, transcription factor 2                             | Yes | -   | -                                    |
| MGI:1924880 | Prdm8   | PR domain containing 8                                                  | Yes | -   | epidermis                            |
| MGI:1929459 | Rabgef1 | RAB guanine nucleotide exchange factor (GEF) 1                          | Yes | -   | epidermis                            |
| MGI:2384418 | Rgs9bp  | regulator of G-protein signalling 9 binding protein                     | Yes | Yes | eye                                  |
| MGI:97930   | Rlbp1   | retinaldehyde binding protein 1                                         | Yes | Yes | eye                                  |
| MGI:1343464 | Rorb    | RAR-related orphan receptor beta                                        | Yes | Yes | eye                                  |
| MGI:1097709 | Rrh     | retinal pigment epithelium derived rhodopsin homolog                    | No  | -   | -                                    |
| MGI:1921456 | Sipa113 | signal-induced proliferation-associated 1 like 3                        | Yes | Yes | eye                                  |
| MGI:1929519 | Slc16a8 | solute carrier family 16 (monocarboxylic acid transporters), member 8   | Yes | Yes | eye                                  |
| MGI:1351866 | Slco4a1 | solute carrier organic anion transporter family, member 4a1             | No  | -   | -                                    |
| MGI:892968  | Tacr3   | tachykinin receptor 3                                                   | Yes | -   | testis, uterus                       |
| MGI:104672  | Tfap2b  | transcription factor AP-2 beta                                          | Yes | Yes | digits, epidermis, kidney, lung, eye |
| MGI:1921597 | Tlhc1   | TBC/LysM associated domain containing 1                                 | No  | -   | -                                    |
| MGI:98880   | Tyr     | tyrosinase                                                              | Yes | Yes | epidermis, eye, kidney               |
| MGI:98881   | Tyrp1   | tyrosinase-related protein 1                                            | Yes | Yes | bone, eye                            |
| MGI:1328357 | Unc119  | unc-119 homolog (C. elegans)                                            | Yes | Yes | eye                                  |
| MGI:1346018 | Vax2    | ventral anterior homeobox containing gene 2                             | Yes | Yes | eye                                  |
| MGI:1921449 | Vit     | vitrin                                                                  | Yes | -   | -                                    |
| MGI:1924662 | Wdr17   | WD repeat domain 17                                                     | Yes | -   | -                                    |
| MGI:2677168 | Zfp563  | zinc finger protein 563                                                 | No  | -   | -                                    |

<sup>1</sup> Affected tissues among the 47 tissues that were considered



**Table S13.** The number of phenotypically unannotated genes (number of genes with available mutant strain but no reported phenotypes in the 47 tissues examined; number of genes whose mutant strain has not been produced) for each set of genes with a given confidence score and a given predicted tissue function. These numbers were calculated based on the data collected in December, 2016.

| Predicted tissue function | Confidence score of genes |                |                  |
|---------------------------|---------------------------|----------------|------------------|
|                           | High                      | Medium         | Low              |
| Adipose tissue            | -                         | 33 (15;18)     | 116 (36;80)      |
| Adrenal gland             | -                         | 35 (13;22)     | 89 (21;68)       |
| Amygdala                  | -                         | -              | -                |
| Bladder                   | -                         | -              | 110 (35;75)      |
| Bone                      | 53 (24;29)                | 553 (202;351)  | 2046 (577;1469)  |
| Bone marrow               | 51 (24;27)                | 395 (152;243)  | 1832 (513;1319)  |
| Brown fat                 | -                         | 45 (21;24)     | 135 (37;98)      |
| Cerebellum                | 82 (38;44)                | 572 (237;335)  | 1205 (338;867)   |
| Cerebral cortex           | 19 (8;11)                 | 352 (150;202)  | 935 (303;632)    |
| Digits                    | -                         | -              | 274 (81;193)     |
| Dorsal root ganglia       | -                         | -              | 151 (52;99)      |
| Dorsal striatum           | -                         | -              | -                |
| Epidermis                 | -                         | 73 (15;58)     | 282 (85;197)     |
| Eye                       | 21 (9; 12)                | 29 (12; 17)    | 475 (115;360)    |
| Frontal cortex            | -                         | -              | 895 (314;581)    |
| Heart                     | 51 (15;36)                | 434 (121;313)  | 6958 (1893;5065) |
| Hippocampus               | 21 (9;12)                 | 382 (161;221)  | 1007 (330;677)   |
| Hypothalamus              | -                         | 32 (11;21)     | 329 (66;263)     |
| Kidney                    | -                         | 142 (39;103)   | 138 (33;105)     |
| Large intestine           | 4 (2;2)                   | 83 (22;61)     | 516 (170;346)    |
| Liver                     | -                         | 259 (93;166)   | 976 (311;665)    |
| Lung                      | -                         | 53 (16;37)     | 403 (129;274)    |
| Lymph node                | 78 (39;39)                | 282 (94;188)   | 1449 (383;1066)  |
| Mammary gland             | -                         | 10 (2;8)       | 43 (10;33)       |
| Medial olfactory epithel. | -                         | -              | 163 (45;118)     |
| Olfactory bulb            | -                         | 9 (1;8)        | 414 (133;281)    |
| Oocyte                    | -                         | 1030 (176;854) | 1952 (469;1483)  |
| Ovary                     | -                         | -              | 35 (8;27)        |
| Pancreas                  | -                         | -              | 256 (78;178)     |
| Pituitary                 | -                         | 11 (4;7)       | 298 (69;229)     |
| Placenta                  | -                         | 507 (135;372)  | 1103 (288;815)   |
| Prostate                  | -                         | 11 (4;7)       | 271 (46;225)     |
| Salivary gland            | -                         | -              | -                |
| Skeletal muscle           | 11 (3;8)                  | 133 (45;88)    | 520 (139;381)    |
| Small intestine           | -                         | -              | 155 (51;104)     |
| Spinal cord               | -                         | 120 (45;75)    | 832 (320;512)    |
| Spleen                    | 118 (57;61)               | 560 (211;349)  | 1746 (501;1245)  |
| Stomach                   | -                         | 23 (4;19)      | 67 (13;54)       |
| Substantia nigra          | -                         | -              | -                |
| Testis                    | -                         | 1030 (176;854) | 1917 (461;1456)  |
| Thymus                    | 34 (15;19)                | 167 (56;111)   | 1277 (336;941)   |
| Thyroid                   | 34 (15;19)                | 167 (56;111)   | 1277 (336;941)   |
| Tongue                    | -                         | 83 (16;67)     | 197 (40;157)     |
| Trachea                   | -                         | -              | 274 (81;193)     |
| Trigeminal                | -                         | -              | 151 (52;99)      |
| Uterus                    | -                         | -              | 64 (15;49)       |
| Vomer nasal organ         | -                         | -              | 34 (9;25)        |

**Table S14.** Candidate genes whose vision/eye phenotype have been examined by IMPC, and the gross eye morphology that have been measured in the gene deletion strains.

| Gene symbol                    | Vision/eye phenotypes that have been examined and found to be not different between gene deletion strain and the wild type control <sup>1</sup>                                                                                                                                                                                                                                                                                                                                                                                   |
|--------------------------------|-----------------------------------------------------------------------------------------------------------------------------------------------------------------------------------------------------------------------------------------------------------------------------------------------------------------------------------------------------------------------------------------------------------------------------------------------------------------------------------------------------------------------------------|
| <b>High confidence genes</b>   |                                                                                                                                                                                                                                                                                                                                                                                                                                                                                                                                   |
| <i>Kcnj14</i>                  | Retina (combined); persistence of hyaloid vascular system; retinal blood vessels pattern; retinal blood vessels structure; retinal blood vessels; optic disk; synechia; fusion between cornea and lens; lens opacity; lens; iris pigmentation; pupil light response; pupil dilation; pupil shape; pupil position; iris/pupil; corneal vascularization; corneal opacity; cornea; narrow eye opening; eyelid closure; eyelid morphology; bulging eye; eye                                                                           |
| <i>Kcnv2</i>                   | Retina (combined); persistence of hyaloid vascular system; retinal blood vessels pattern; retinal blood vessels structure; retinal blood vessels; optic disk; synechia; fusion between cornea and lens; lens opacity; lens; iris pigmentation; pupil light response; pupil dilation; pupil shape; pupil position; iris/pupil; corneal vascularization; corneal opacity; cornea; narrow eye opening; eyelid closure; eyelid morphology; bulging eye                                                                                |
| <b>Medium confidence genes</b> |                                                                                                                                                                                                                                                                                                                                                                                                                                                                                                                                   |
| <i>Adal</i>                    | Retina (combined); persistence of hyaloid vascular system; retinal blood vessels pattern; retinal blood vessels structure; retinal blood vessels; optic disk; synechia; fusion between cornea and lens; lens opacity; lens; iris pigmentation; pupil light response; pupil dilation; pupil shape; pupil position; iris/pupil; corneal vascularization; corneal opacity; cornea; narrow eye opening; eyelid closure; eyelid morphology; bulging eye                                                                                |
| <i>Fabp12</i>                  | Eye wetness; eye size; eye opacity; eye; iris pigmentation; iris/pupil light response; iris/pupil shape; iris/pupil position; iris/pupil; lens opacity; lens; corneal vascularization; corneal opacity; cornea; eyelid closure                                                                                                                                                                                                                                                                                                    |
| <i>Plk5</i>                    | Retina (combined); vitreous; iris transillumination; corneal deposits; corneal sclerization; persistence of hyaloid vascular system; retinal blood vessels pattern; retinal blood vessels structure; retinal blood vessels; optic disk; synechia; fusion between cornea and lens; lens opacity; lens; iris pigmentation; pupil light response; pupil dilation; pupil shape; pupil position; iris/pupil; corneal vascularization; corneal opacity; cornea; narrow eye opening; eyelid closure; eyelid morphology; bulging eye; eye |
| <i>Wdr17</i>                   | Retina (combined); vitreous; iris transillumination; corneal deposits; corneal sclerization; persistence of hyaloid vascular system; retinal blood vessels pattern; retinal blood vessels structure; retinal blood vessels; optic disk; synechia; fusion between cornea and lens; lens opacity; lens; iris pigmentation; pupil light response; pupil dilation; pupil shape; pupil position; iris/pupil; corneal vascularization; corneal opacity; cornea; narrow eye opening; eyelid closure; eyelid morphology; bulging eye; eye |

<sup>1</sup> The significance threshold of  $P=10^{-4}$  by Fisher's exact test was used by IMPC

**Table S15.** human and zebrafish orthologs of mouse eye candidate genes

| Gene Symbol                    | Ensembl ID           | Number of human orthologs | Ensembl IDs of human orthologs | Number of zebrafish orthologs | Ensembl IDs of zebrafish orthologs (protein identity, protein similarity) |
|--------------------------------|----------------------|---------------------------|--------------------------------|-------------------------------|---------------------------------------------------------------------------|
| <b>High confidence genes</b>   |                      |                           |                                |                               |                                                                           |
| <i>Ankrd33</i>                 | ENSMUSG000000047034  | 1                         | ENSG000000167612               | 2                             | ENSDARG00000002508 (29.2%, 37.2%); ENSDARG000000055638 (29.0%, 40.5%)     |
| <i>Arr3</i>                    | ENSMUSG000000060890  | 1                         | ENSG000000120500               | 2                             | ENSDARG000000056511 (52.5%, 67.7%); ENSDARG000000098475 (47.0%, 67.7%)    |
| <i>Cnga1</i>                   | ENSMUSG000000067220  | 1                         | ENSG000000198515               | 2                             | ENSDARG000000012125 (66.1%, 73.1%); ENSDARG000000029898 (58.0%, 68.6%)    |
| <i>Cryba4</i>                  | ENSMUSG000000066975  | 1                         | ENSG000000196431               | 1                             | ENSDARG000000024548 (68.4%, 80.6%)                                        |
| <i>Crybb3</i>                  | ENSMUSG000000029352  | 1                         | ENSG000000100053               | 1                             | ENSDARG000000041301 (54.4%, 68.0%)                                        |
| <i>Gm4792</i>                  | ENSMUSG000000053420  | 0                         |                                | 0                             |                                                                           |
| <i>Gm9918</i>                  | ENSMUSG000000097050  | 1                         | ENSG000000283536               | 0                             |                                                                           |
| <i>Grfn</i>                    | ENSMUSG000000036586  | 1                         | ENSG000000275572               | 1                             | ENSDARG000000033382 (41.7%, 59.0%)                                        |
| <i>Kcnj14</i>                  | ENSMUSG000000058743  | 1                         | ENSG000000182324               | 1                             | ENSDARG000000075914 (47.6%, 57.0%)                                        |
| <i>Kcnv2</i>                   | ENSMUSG000000047298  | 1                         | ENSG000000168263               | 2                             | ENSDARG000000062906 (52.0%, 62.8%); ENSDARG000000076644 (55.0%, 66.2%)    |
| <i>Lrt1</i>                    | ENSMUSG000000041044  | 1                         | ENSG000000148602               | 2                             | ENSDARG000000019179 (47.6%, 63.5%); ENSDARG000000099406 (46.2%, 61.0%)    |
| <i>Lrt2</i>                    | ENSMUSG000000043418  | 1                         | ENSG000000204033               | 1                             | ENSDARG000000030626 (43.3%, 58.5%)                                        |
| <i>Miana</i>                   | ENSMUSG000000024806  | 1                         | ENSG000000120215               | 1                             | ENSDARG0000000102558 (60.7%, 64.3%)                                       |
| <i>Pde6h</i>                   | ENSMUSG000000064330  | 1                         | ENSG000000139053               | 1                             | ENSDARG0000000103030 (30.6%, 38.7%); ENSDARG0000000104980 (47.8%, 62.3%)  |
| <i>Ppef2</i>                   | ENSMUSG000000029410  | 1                         | ENSG000000156194               | 2                             | ENSDARG000000010231 (38.1%, 53.6%); ENSDARG000000057032 (38.6%, 53.6%)    |
| <i>Ppm1n</i>                   | ENSMUSG000000030402  | 1                         | ENSG000000213889               | 2                             | ENSDARG000000060354 (25.2%, 36.6%)                                        |
| <i>Samd7</i>                   | ENSMUSG0000000051860 | 1                         | ENSG000000187033               | 1                             | ENSDARG0000000026248 (70.9%, 79.7%); ENSDARG000000034940 (69.1%, 79.2%)   |
| <i>Sic1a7</i>                  | ENSMUSG000000008932  | 1                         | ENSG000000162383               | 2                             | ENSDARG0000000001880 (74.1%, 85.5%); ENSDARG000000051981 (54.9%, 66.3%)   |
| <i>Slx3</i>                    | ENSMUSG0000000041488 | 1                         | ENSG000000166900               | 2                             |                                                                           |
| <i>Tmem215</i>                 | ENSMUSG000000046593  | 1                         | ENSG000000188133               | 1                             |                                                                           |
| <i>Tspan10</i>                 | ENSMUSG0000000039691 | 1                         | ENSG000000182612               | 1                             | ENSDARG0000000044767 (33.1%, 53%)                                         |
| <b>Medium confidence genes</b> |                      |                           |                                |                               |                                                                           |
| <i>4632404H12Rik</i>           | ENSMUSG0000000042579 | 0                         |                                | 0                             |                                                                           |
| <i>Adal</i>                    | ENSMUSG0000000027259 | 1                         | ENSG000000168803               | 1                             | ENSDARG000000012986 (58.3%, 68.6%)                                        |
| <i>Car14</i>                   | ENSMUSG0000000038526 | 1                         | ENSG000000118298               | 1                             | ENSDARG000000061697 (41.8%, 56.3%)                                        |
| <i>Ccdc126</i>                 | ENSMUSG0000000050786 | 1                         | ENSG000000169193               | 1                             | ENSDARG0000000062695 (41.6%, 57.2%)                                       |
| <i>Cxos</i>                    | ENSMUSG000000074365  | 0                         |                                | 0                             |                                                                           |
| <i>Crybb1</i>                  | ENSMUSG000000029343  | 1                         | ENSG000000100122               | 1                             | ENSDARG000000068507 (56.9%, 68.0%)                                        |
| <i>Crygn</i>                   | ENSMUSG0000000038135 | 1                         | ENSG000000127377               | 2                             | ENSDARG0000000030411 (61.2%, 75.2%); ENSDARG0000000102129 (71.0%, 85.3%)  |
| <i>Defb9</i>                   | ENSMUSG000000047390  | 0                         |                                | 0                             |                                                                           |

|         |                    |   |                 |   |                                                                                                         |
|---------|--------------------|---|-----------------|---|---------------------------------------------------------------------------------------------------------|
| Dhx32   | ENSMUSG00000030986 | 1 | ENSG00000089876 | 2 | ENSDARG00000077461 (50.2%, 66.7%); ENSDARG00000079029 (52.7%, 67.0%)                                    |
| Dkk3    | ENSMUSG00000030772 | 1 | ENSG00000050165 | 2 | ENSDARG00000070683 (34.7%, 46.4%); ENSDARG00000103591 (30.4%, 46.4%)                                    |
| Fabp12  | ENSMUSG00000027530 | 1 | ENSG00000197416 | 3 | ENSDARG00000002311 (44.0%, 60.5%); ENSDARG00000017299 (45.5%, 59.0%); ENSDARG00000099907 (34.1%, 43.2%) |
| Fam169a | ENSMUSG00000041817 | 1 | ENSG00000198780 | 2 | ENSDARG00000004177 (31.3%, 43.6%); ENSDARG00000059719 (25.1%, 33.7%)                                    |
| Fam19a3 | ENSMUSG00000055865 | 1 | ENSG00000184599 | 1 | ENSDARG00000074119 (24.9%, 35.5%)                                                                       |
| Fimpd2  | ENSMUSG00000108841 | 1 | ENSG00000170324 | 1 | ENSDARG00000074119 (24.9%, 35.5%)                                                                       |
| Gzmm    | ENSMUSG00000054206 | 1 | ENSG00000197540 | 2 | ENSDARG00000074839 (24.4%, 39.0%); ENSDARG00000077187 (30.6%, 41.9%)                                    |
| Impg1   | ENSMUSG00000032343 | 1 | ENSG00000112706 | 2 | ENSDARG00000056874 (36.2%, 49.8%); ENSDARG00000071701 (35.7%, 48.8%); ENSDARG00000099562 (32.9%, 47.9%) |
| Lyg2    | ENSMUSG00000061584 | 1 | ENSG00000185674 | 3 | ENSDARG00000059287 (55.1%, 62.9%)                                                                       |
| Mak     | ENSMUSG00000021363 | 1 | ENSG00000111837 | 1 | ENSDARG00000059287 (55.1%, 62.9%)                                                                       |
| Mgapr   | ENSMUSG00000037161 | 1 | ENSG00000137463 | 0 |                                                                                                         |
| Olor    | ENSMUSG00000027416 | 1 | ENSG00000125879 | 0 |                                                                                                         |
| Pdzph1  | ENSMUSG00000024227 | 0 |                 | 1 | ENSDARG00000102251 (8.0%, 9.2%)                                                                         |
| Plk5    | ENSMUSG00000035486 | 1 | ENSG00000185988 | 0 |                                                                                                         |
| Pou6f2  | ENSMUSG00000009734 | 1 | ENSG00000106536 | 1 | ENSDARG00000086362 (66.9%, 71.9%)                                                                       |
| Rrh     | ENSMUSG00000028012 | 1 | ENSG00000180245 | 1 | ENSDARG00000039534 (58.1%, 69.1%)                                                                       |
| Sicc4a1 | ENSMUSG00000038963 | 1 | ENSG00000101187 | 1 | ENSDARG00000075948 (58.0%, 68.4%)                                                                       |
| Tidc1   | ENSMUSG00000034105 | 1 | ENSG00000140950 | 1 | ENSDARG00000062951 (43.5%, 60.0%)                                                                       |
| Vit     | ENSMUSG00000024076 | 1 | ENSG00000205221 | 1 | ENSDARG00000063631 (49.7%, 60.9%)                                                                       |
| Wdr17   | ENSMUSG00000039375 | 1 | ENSG00000150627 | 1 | ENSDARG00000075098 (76.6%, 85.0%)                                                                       |
| Zfp563  | ENSMUSG00000067424 | 1 | ENSG00000214189 | 0 |                                                                                                         |

**Table S16.** Information of morpholino oligoes for functional validation in the zebrafish system.

| Name of MO                           | Injected amount (ng) <sup>3</sup> | Sequence of morpholino oligoes (length in nucleotides) | Target zebrafish gene (Ensembl ID) | Mouse ortholog of zebrafish target (confidence core) |
|--------------------------------------|-----------------------------------|--------------------------------------------------------|------------------------------------|------------------------------------------------------|
| <i>adal</i>                          | 3                                 | AAAGAGATCCGGCTTCGGTGTCCATC (25)                        | ENSDARG00000012986                 | Adal (medium)                                        |
| <i>ankrd33aa</i>                     | 4                                 | ACTTTAACCCCGCCATCTGGCC (23)                            | ENSDARG00000055638                 | Ankrd33 (high)                                       |
| <i>ankrd33ab</i>                     | 4                                 | AACTGCTGCCATCCCTTAACAGATC (25)                         | ENSDARG00000002508                 | Ankrd33 (high)                                       |
| <i>car14</i>                         | 4                                 | ACTATTCTCCCAACGGCGCAACTTAC (25)                        | ENSDARG000000061697                | Car14 (medium)                                       |
| <i>ccdc126</i>                       | 8                                 | CTCCGAGGAGACGCCAGCATG (24)                             | ENSDARG000000062695                | Ccdc126 (medium)                                     |
| <i>dhx32a</i>                        | 3                                 | CTGAAAAGTCCACCATTTCCAGCCAT (25)                        | ENSDARG00000077461                 | Dhx32 (medium)                                       |
| <i>dhx32b</i>                        | 4                                 | ATAAATCTTTGGCGTCAGTAGCTCA (25)                         | ENSDARG00000079029                 | Dhx32 (medium)                                       |
| <i>dkk3a</i>                         | 4                                 | AGGCTGAATCCGAGCAGAAACATGT (25)                         | ENSDARG00000103591                 | DKK3 (medium)                                        |
| <i>dkk3b</i>                         | 6                                 | TCATCGATTTGAGCATCGCGTTGAG (25)                         | ENSDARG00000070683                 | DKK3 (medium)                                        |
| <i>fam169aa</i>                      | 6                                 | TTTATTCTCGTGAACCTCAGTGCAT (25)                         | ENSDARG00000059719                 | Fam169a (medium)                                     |
| <i>fam169ab</i>                      | 4                                 | GAACTCCATCCCTTAGCCCTGTAGA (25)                         | ENSDARG00000004177                 | Fam169a (medium)                                     |
| <i>frmpd2</i>                        | 3                                 | GGGTCACAAACGTGCTCATTCTTTC (25)                         | ENSDARG00000074119                 | Frmpd2 (medium)                                      |
| <i>grifin</i>                        | 8                                 | CTCAAACCGTAATGTCATCTCGTCT (25)                         | ENSDARG00000033382                 | Grifin (high)                                        |
| <i>kcnj14</i>                        | 3                                 | CCATTACAGACCCCCACAGAGTGAC (25)                         | ENSDARG00000075914                 | Kcnj14 (high)                                        |
| <i>lrit2</i>                         | 4                                 | ACATCCATGGTCTCCCTATAAATGT (25)                         | ENSDARG00000030626                 | Lrit2 (high)                                         |
| <i>pax6</i> <sup>1</sup>             | 3                                 | TGGIATTCCTTTTGAAGGCAATTCGC (25)                        | ENSDARG00000045936                 | Pax6 (-)                                             |
| <i>ppef2a</i>                        | 4                                 | GTGTATCTTCGTCTCATTTCATGCG (25)                         | ENSDARG00000104980                 | Ppef2 (high)                                         |
| <i>ppef2b</i>                        | 4                                 | TTGGAGCGTCCACATCCCATCTC (23)                           | ENSDARG00000103030                 | Ppef2 (high)                                         |
| <i>ppm1na</i>                        | 3                                 | CACCCGTGATCCCTCCGGTTCAATC (23)                         | ENSDARG00000010231                 | Ppm1n (high)                                         |
| <i>ppm1nb</i>                        | 4                                 | GCTTCCTTTCTAGATGTCCTCATG (25)                          | ENSDARG00000057032                 | Ppm1n (high)                                         |
| <i>tlhc1</i>                         | 3                                 | CTGGAGGAAAAATCTACGATTACTTG (25)                        | ENSDARG000000062951                | Tlhc1 (medium)                                       |
| <i>wdr17</i>                         | 3                                 | TCGCCCTCACATACGACAGGCCGAA (25)                         | ENSDARG000000075098                | Wdr17 (medium)                                       |
| <b>Standard Control</b> <sup>2</sup> |                                   | CCTCTTACCTCAGTTACAAATTATTA (25)                        | None                               | -                                                    |

<sup>1</sup> Positive control

<sup>2</sup> Negative control

<sup>3</sup> Determined by the highest dosage that maintain the embryonic survival rate > 60 % at 72 hours post injection
